# Supplementary material for: A metal–metal bond passing through the arene ligand: a theoretical study on inverse sandwiches X[Sc–C8H8–Sc]nX (X = F, Cl, Br; n = 1, 2)
Source: Royal Society of Chemistry journal article supplement (doi:10.1039/c4nj01832j), 2014-12-10
Supplement: c4nj01832j1.pdf [file c4nj01832j1.pdf]

# Metal-metal bond passing through the arene ligand: Theoretical study on inverse sandwiches $X[\text{Sc-C}_8\text{H}_8\text{-Sc}]_nX$ ( $X = \text{F, Cl, Br; } n = 1, 2$ )

Nan-Nan Liu\*, and Yi-Hong Ding\*

This supplementary material belongs to *New Journal of Chemistry*, and is uploaded in November, 2014.

## Part 1 Bond Analysis

### 1. The Sc-Sc interaction in triplet $X[\text{Sc-C}_8\text{H}_8\text{-Sc}]X$ ( $X = \text{F, Cl, Br}$ )

The Sc-Sc bond is not totally broken in the triplet state. In triplet  $X[\text{Sc-C}_8\text{H}_8\text{-Sc}]X$ , the Mayer and Wiberg bond orders of Sc-Sc are 0.26, 0.27 for  $X = \text{F}$ , 0.27 and 0.29 for  $X = \text{Cl}$ , 0.28 and 0.29 for  $X = \text{Br}$ . Figure 1 shows the  $\alpha$ -HOMO and  $\beta$ -HOMO ( $\alpha$  is lower in energy than  $\beta$ ) of  $X[\text{Sc-C}_8\text{H}_8\text{-Sc}]X$ , Figure 2 shows the LOL plot of Sc-Sc in  $X[\text{Sc-C}_8\text{H}_8\text{-Sc}]X$ , Figure 3 shows the value of orbital wave-function of  $\alpha$ -HOMO and  $\beta$ -HOMO. From LOL values, the minima of 0.266 for  $X = \text{F}$ , 0.320 for  $X = \text{Cl}$  and 0.332 for  $X = \text{Br}$  are found in the middle area between two Sc atoms. Thus, although weak, the Sc-Sc interaction also exist in triplet  $X[\text{Sc-C}_8\text{H}_8\text{-Sc}]X$ .

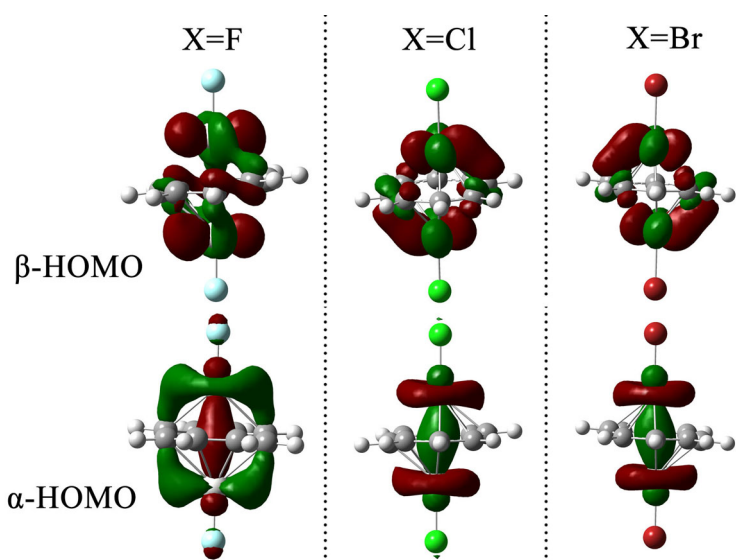

Figure 1 The  $\alpha$ -HOMO and  $\beta$ -HOMO of  $X[\text{Sc-C}_8\text{H}_8\text{-Sc}]X$  ( $X = \text{F, Cl, Br}$ )

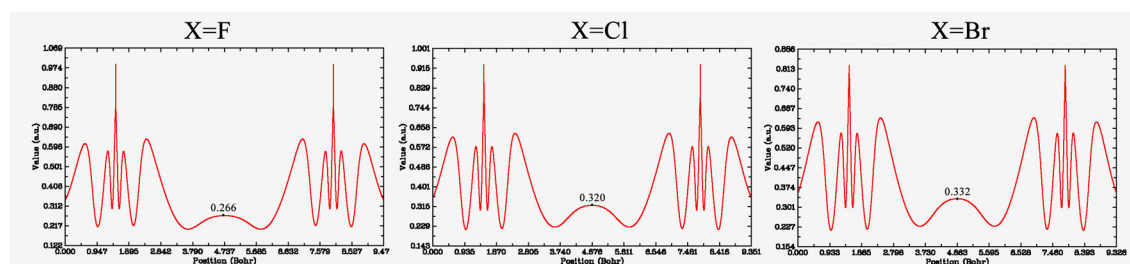

**Figure 2** The LOL values of Sc-Sc interaction of  $X[\text{Sc-C}_8\text{H}_8\text{-Sc}]X$  ( $X=\text{F, Cl, Br}$ )

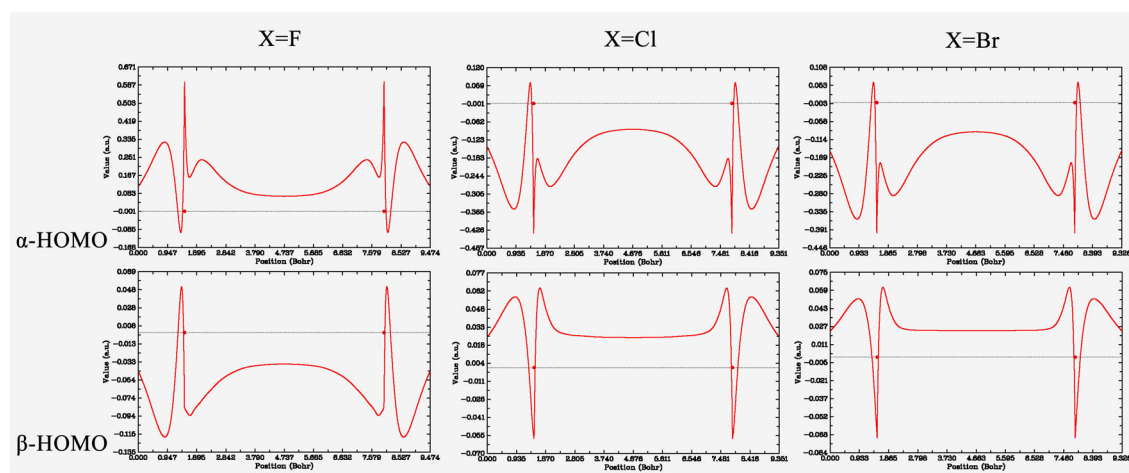

**Figure 3** The wave-function values of  $\alpha$ -HOMO and  $\beta$ -HOMO of  $X[\text{Sc-C}_8\text{H}_8\text{-Sc}]X$  ( $X=\text{F, Cl, Br}$ )

## 2. The Sc-Sc interaction in triplet $X[\text{Sc-C}_8\text{H}_8\text{-Sc}]_2X$ ( $X=\text{F, Cl, Br}$ )

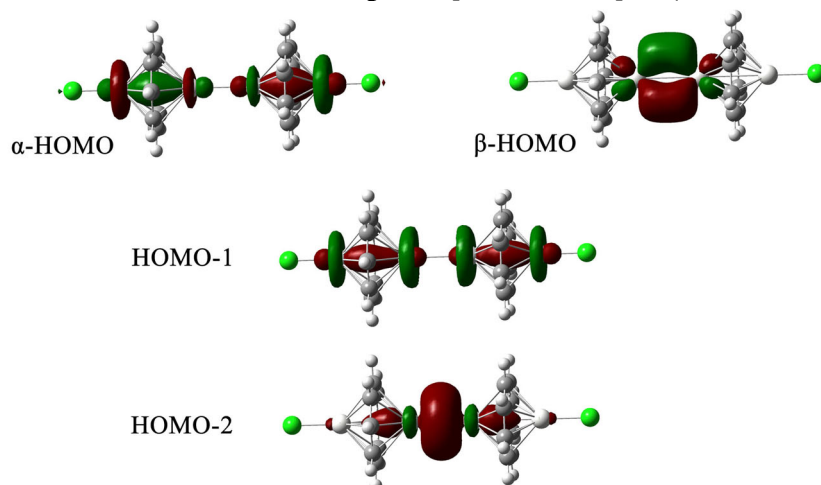

**Figure 4.**  $\alpha$ -HOMO,  $\beta$ -HOMO, HOMO-1 and HOMO-2 of  $X[\text{Sc-C}_8\text{H}_8\text{-Sc}]_2X$  ( $X=\text{F, Cl, Br}$ )

In singlet  $X[\text{Sc-C}_8\text{H}_8\text{-Sc}]_2X$ , the central Sc-Sc is single bond, but in the triplet, it could be roughly seemed as one and a half bond. Figure 4 shows the  $\alpha$ -HOMO,  $\beta$ -HOMO, HOMO-1 and HOMO-2 ( $\alpha$  is lower in energy than  $\beta$ ) of  $X[\text{Sc-C}_8\text{H}_8\text{-Sc}]_2X$ . Between the central Sc atoms, HOMO-2 is a  $\sigma_{\text{Sc-Sc}}$  single bond, and  $\beta$ -HOMO could be seemed as  $\pi_{\text{Sc-Sc}}$  half bond. The Mayer bond orders of the central and terminal Sc-Sc bonds in singlet  $X[\text{Sc-C}_8\text{H}_8\text{-Sc}]_2X$  are 0.98 and 0.69 for F, 0.94 and 0.71 for Cl, 0.93 and 0.72 for Br, respectively; in triplet, the values are 1.18 and 0.45 for F, 1.16 and 0.43 for Cl, 1.15 and 0.44 for Br, respectively. The stronger central Sc-Sc bond is in the triplet than in the singlet. This might be the reason for why the longer and shorter central Sc-Sc bond of  $X[\text{Sc-C}_8\text{H}_8\text{-Sc}]_2X$  in the singlet and triplet spin states.

## Part 2 Coordination Information

### 1. The detailed Cartesian coordinates of $X[\text{Sc-C}_8\text{H}_8\text{-Sc}]X$ ( $X = \text{F, Cl, Br}$ ) obtained at

**PBEPBE/ TZVP level.****singlet FSc-C<sub>8</sub>H<sub>8</sub>-ScF**

Charge = 0 Multiplicity = 1

|    |             |             |             |
|----|-------------|-------------|-------------|
| C  | 0.00084300  | -1.01574900 | 1.55320300  |
| C  | -0.00008300 | 0.38003900  | 1.81696000  |
| C  | -0.00101600 | 1.55312900  | 1.01593600  |
| C  | 0.00182200  | -1.81677900 | 0.38011600  |
| C  | -0.00182000 | 1.81689100  | -0.37985200 |
| C  | 0.00098400  | -1.55301600 | -1.01567100 |
| C  | 0.00008200  | -0.37992900 | -1.81670100 |
| H  | 0.00158700  | -1.61571400 | 2.46927300  |
| H  | -0.00017300 | 0.60384200  | 2.88879900  |
| H  | -0.00183600 | 2.46919700  | 1.61590400  |
| H  | 0.00273300  | -2.88861700 | 0.60391900  |
| H  | 0.00179900  | -2.46908500 | -1.61563900 |
| C  | -0.00081100 | 1.01585900  | -1.55293700 |
| H  | -0.00273200 | 2.88872700  | -0.60365900 |
| H  | -0.00154600 | 1.61582300  | -2.46900800 |
| H  | 0.00017300  | -0.60373200 | -2.88853900 |
| Sc | -1.63123600 | -0.00120000 | 0.00026500  |
| Sc | 1.63123600  | 0.00128000  | -0.00007700 |
| F  | 3.53333200  | -0.00004700 | -0.00066400 |
| F  | -3.53333300 | -0.00048400 | -0.00059500 |

State=1-A\HF=-2030.0967855\RMSD=8.088e-09\RMSF=8.139e-05\ZeroPoint=0.1349022\Thermal=0.1481907\

**triplet FSc-C<sub>8</sub>H<sub>8</sub>-ScF**

Charge = 0 Multiplicity = 3

|    |             |             |             |
|----|-------------|-------------|-------------|
| C  | -1.17551400 | 0.31389100  | -1.41558100 |
| C  | -0.90205100 | 1.48393900  | -0.66545700 |
| C  | -0.02618200 | 1.80895200  | 0.42043200  |
| C  | -0.67892400 | -1.03011100 | -1.39693700 |
| C  | 0.67892500  | 1.03116000  | 1.39735300  |
| C  | 0.02618100  | -1.80790300 | -0.42001600 |
| C  | 0.90205100  | -1.48289000 | 0.66587300  |
| H  | -1.84106400 | 0.50236600  | -2.25990700 |
| H  | -1.40728000 | 2.36456700  | -1.06663700 |
| H  | -0.06835800 | 2.86927400  | 0.67781700  |
| H  | -1.09984700 | -1.63970600 | -2.19899300 |
| H  | 0.06835700  | -2.86822500 | -0.67740000 |
| C  | 1.17551400  | -0.31284200 | 1.41599600  |
| H  | 1.09984800  | 1.64075600  | 2.19940900  |
| H  | 1.84106500  | -0.50131600 | 2.26032200  |
| H  | 1.40727900  | -2.36351800 | 1.06705400  |
| Sc | 1.22898800  | 0.40391600  | -1.12284200 |
| Sc | -1.22898900 | -0.40286700 | 1.12325900  |
| F  | -2.53977200 | -0.89026400 | 2.38417600  |
| F  | 2.53977300  | 0.89131500  | -2.38375800 |

State=3-A\HF=-2030.0856378\S2=2.006166\S2-1=0.\S2A=2.000018\RMSD=8.360e-09\RMSF=1.583e-05\ZeroPoint=0.133084\Thermal=0.1472925\

**singlet ClSc-C<sub>8</sub>H<sub>8</sub>-ScCl**

Charge = 0 Multiplicity = 1

|    |             |             |             |
|----|-------------|-------------|-------------|
| C  | -0.00011700 | 1.26152800  | -1.36503000 |
| C  | -0.00005800 | 1.85707000  | -0.07309000 |
| C  | 0.00005200  | 1.36513900  | 1.26144600  |
| C  | -0.00082100 | -0.07302700 | -1.85694000 |
| C  | 0.00082100  | 0.07317900  | 1.85696400  |
| C  | -0.00005900 | -1.36498700 | -1.26142200 |
| C  | 0.00005800  | -1.85691800 | 0.07311400  |
| H  | -0.00076200 | 2.00503900  | -2.16905100 |
| H  | -0.00007800 | 2.95134200  | -0.11604100 |
| H  | 0.00063400  | 2.16912800  | 2.00499200  |
| H  | -0.00069700 | -0.11597400 | -2.95121400 |
| H  | -0.00064500 | -2.16897700 | -2.00496700 |
| C  | 0.00012300  | -1.26137600 | 1.36505400  |
| H  | 0.00069700  | 0.11612400  | 2.95123800  |
| H  | 0.00077500  | -2.00488900 | 2.16907400  |
| H  | 0.00007800  | -2.95118900 | 0.11606400  |
| Cl | -3.92962200 | -0.00020700 | 0.00001900  |
| Cl | 3.92962200  | -0.00020000 | -0.00008300 |
| Sc | 1.59281800  | 0.00008800  | -0.00035400 |
| Sc | -1.59281900 | 0.00003900  | 0.00037400  |

State=1-A\HF=-2750.5736401\RMSD=3.369e-09\RMSF=7.371e-05\ZeroPoint=0.1347754\Thermal=0.1479465\

**triplet ClSc-C<sub>8</sub>H<sub>8</sub>-ScCl**

Charge = 0 Multiplicity = 3

|    |             |             |             |
|----|-------------|-------------|-------------|
| C  | -1.22244000 | 0.28737000  | -1.37278000 |
| C  | -0.92797300 | 1.46453600  | -0.62337000 |
| C  | -0.10087800 | 1.79552800  | 0.48861400  |
| C  | -0.67732100 | -1.03614300 | -1.42128900 |
| C  | 0.67733200  | 1.03718900  | 1.42170300  |
| C  | 0.10088600  | -1.79448100 | -0.48819800 |
| C  | 0.92797200  | -1.46349400 | 0.62379500  |
| H  | -1.92060600 | 0.48551300  | -2.18861100 |
| H  | -1.47894200 | 2.33176800  | -0.99402200 |
| H  | -0.19476000 | 2.84560500  | 0.77267100  |
| H  | -1.08250400 | -1.63967100 | -2.23594700 |
| H  | 0.19476000  | -2.84455900 | -0.77225000 |
| C  | 1.22244200  | -0.28632700 | 1.37320400  |
| H  | 1.08251000  | 1.64071700  | 2.23636400  |
| H  | 1.92059800  | -0.48447400 | 2.18904200  |
| H  | 1.47892900  | -2.33073000 | 0.99445600  |
| Sc | 1.22745200  | 0.29097200  | -1.11019700 |

|    |             |             |             |
|----|-------------|-------------|-------------|
| Sc | -1.22744600 | -0.28990700 | 1.11059500  |
| Cl | 2.98198100  | 0.75753100  | -2.58117100 |
| Cl | -2.98199500 | -0.75644500 | 2.58155100  |

State=3-A\HF=-2750.5527002\S2=2.006939\S2-1=0.\S2A=2.000024\RMSD=6.120e-09\RMSF=2.890e-05\ZeroPoint=0.1323349\Thermal=0.1467806\

**singlet BrSc-C<sub>8</sub>H<sub>8</sub>-ScBr**

Charge = 0 Multiplicity = 1

|    |             |             |             |
|----|-------------|-------------|-------------|
| C  | -0.00118400 | 1.35853600  | -1.27026900 |
| C  | 0.00003600  | 1.85912100  | 0.06201500  |
| C  | 0.00094700  | 1.27085100  | 1.35816800  |
| C  | -0.00246000 | 0.06237600  | -1.85852300 |
| C  | 0.00245700  | -0.06144100 | 1.85873900  |
| C  | -0.00097500 | -1.26991500 | -1.35795400 |
| C  | -0.00004000 | -1.85817800 | -0.06180000 |
| H  | -0.00253000 | 2.15795300  | -2.01863300 |
| H  | -0.00012300 | 2.95356100  | 0.09808900  |
| H  | 0.00239500  | 2.01920000  | 2.15759900  |
| H  | -0.00299900 | 0.09844600  | -2.95296300 |
| H  | -0.00242100 | -2.01826500 | -2.15738100 |
| C  | 0.00120300  | -1.35760000 | 1.27048500  |
| H  | 0.00299300  | -0.09751200 | 2.95317900  |
| H  | 0.00254600  | -2.15702000 | 2.01884400  |
| H  | 0.00011700  | -2.95261700 | -0.09787500 |
| Sc | 1.58289900  | 0.00047200  | -0.00144000 |
| Sc | -1.58289700 | 0.00040900  | 0.00164300  |
| Br | 4.07304900  | -0.00061700 | -0.00023300 |
| Br | -4.07304600 | -0.00066100 | -0.00006100 |

State=1-A\HF=-6978.0677449\RMSD=2.706e-09\RMSF=6.220e-05\ZeroPoint=0.1343418\Thermal=0.1477835\

**triplet BrSc-C<sub>8</sub>H<sub>8</sub>-ScBr**

Charge = 0 Multiplicity = 3

|   |             |             |             |
|---|-------------|-------------|-------------|
| C | -1.21931900 | 0.28855300  | -1.37798800 |
| C | -0.92586200 | 1.46455600  | -0.62706000 |
| C | -0.09649200 | 1.79515300  | 0.48472100  |
| C | -0.67898800 | -1.03711700 | -1.42072400 |
| C | 0.67897900  | 1.03817100  | 1.42114200  |
| C | 0.09648600  | -1.79410000 | -0.48430700 |
| C | 0.92586300  | -1.46349900 | 0.62746900  |
| H | -1.91413900 | 0.48711300  | -2.19662200 |
| H | -1.47315000 | 2.33358200  | -0.99928400 |
| H | -0.18799000 | 2.84629200  | 0.76610100  |
| H | -1.08262800 | -1.64169700 | -2.23541200 |
| H | 0.18799000  | -2.84523700 | -0.76569200 |
| C | 1.21931600  | -0.28749700 | 1.37840100  |

|    |             |             |             |
|----|-------------|-------------|-------------|
| H  | 1.08262100  | 1.64275100  | 2.23582800  |
| H  | 1.91414400  | -0.48605500 | 2.19702900  |
| H  | 1.47316100  | -2.33252200 | 0.99968400  |
| Sc | 1.22008400  | 0.29553500  | -1.10684400 |
| Sc | -1.22008800 | -0.29449800 | 1.10727600  |
| Br | -3.08825700 | -0.81166100 | 2.67561300  |
| Br | 3.08826900  | 0.81267700  | -2.67516700 |

State=3-A\HF=-6978.0451212\S2=2.007314\S2-1=0.\S2A=2.000027\RMSD=5.607e-09\RMSF=3.142e-05\ZeroPoint=0.1318363\Thermal=0.1465955\

#### 4. The detailed Cartesian coordinates of XSc-C<sub>8</sub>H<sub>8</sub>-ScX (X = F, Cl, Br) obtained at PBEPBE/ TZVPP level.

##### singlet FSc-C<sub>8</sub>H<sub>8</sub>-ScF

Charge = 0 Multiplicity = 1

|    |             |             |             |
|----|-------------|-------------|-------------|
| C  | 0.00071200  | 1.27151100  | -1.35263200 |
| C  | 0.00006600  | 1.85542200  | -0.05737400 |
| C  | -0.00041100 | 1.35287600  | 1.27133400  |
| C  | -0.00521500 | -0.05720300 | -1.85516500 |
| C  | 0.00521800  | 0.05761100  | 1.85523200  |
| C  | 0.00030800  | -1.35247300 | -1.27127300 |
| C  | -0.00006900 | -1.85500700 | 0.05744000  |
| H  | -0.00206100 | 2.02117500  | -2.14989200 |
| H  | 0.00021200  | 2.94923700  | -0.09103600 |
| H  | 0.00241200  | 2.15012700  | 2.02100600  |
| H  | -0.00432200 | -0.09086500 | -2.94898100 |
| H  | -0.00255400 | -2.14972900 | -2.02094200 |
| C  | -0.00061000 | -1.27110800 | 1.35270400  |
| H  | 0.00432800  | 0.09127000  | 2.94904700  |
| H  | 0.00221800  | -2.02077800 | 2.14995800  |
| H  | -0.00021200 | -2.94882600 | 0.09110000  |
| Sc | 1.63447400  | -0.00002900 | -0.00172900 |
| Sc | -1.63447500 | 0.00029200  | 0.00177100  |
| F  | 3.52809400  | -0.00097600 | -0.00053800 |
| F  | -3.52809400 | -0.00090100 | 0.00023200  |

State=1-A\HF=-2030.1328072\RMSD=4.132e-09\RMSF=6.718e-04\ZeroPoint=0.1340376\Thermal=0.1478539\

##### triplet FSc-C<sub>8</sub>H<sub>8</sub>-ScF

Charge = 0 Multiplicity = 3

|   |             |             |             |
|---|-------------|-------------|-------------|
| C | -1.17388000 | 0.31341800  | -1.41484200 |
| C | -0.89883300 | 1.48414900  | -0.66731600 |
| C | -0.02498500 | 1.81054000  | 0.41981300  |
| C | -0.67992700 | -1.03144100 | -1.39588900 |
| C | 0.67992400  | 1.03249100  | 1.39630900  |
| C | 0.02499100  | -1.80948900 | -0.41939900 |
| C | 0.89883600  | -1.48309800 | 0.66773300  |
| H | -1.83900700 | 0.50206600  | -2.25868500 |

|    |             |             |             |
|----|-------------|-------------|-------------|
| H  | -1.40379900 | 2.36364000  | -1.06961600 |
| H  | -0.06587800 | 2.87086000  | 0.67504600  |
| H  | -1.10100300 | -1.63961200 | -2.19823000 |
| H  | 0.06588600  | -2.86980800 | -0.67463500 |
| C  | 1.17387800  | -0.31236900 | 1.41526300  |
| H  | 1.10099500  | 1.64066100  | 2.19865300  |
| H  | 1.83900200  | -0.50101700 | 2.25910800  |
| H  | 1.40380300  | -2.36258900 | 1.07003100  |
| Sc | 1.21779200  | 0.39945200  | -1.10799800 |
| Sc | -1.21779200 | -0.39840300 | 1.10841000  |
| F  | -2.52061800 | -0.89053200 | 2.36847600  |
| F  | 2.52061500  | 0.89158100  | -2.36806800 |

State=3-A\HF=-2030.1213933\S2=2.005904\S2-1=0.\S2A=2.000017\RMSD=4.127e-09\RMSF=1.001e-05\ZeroPoint=0.1329826\Thermal=0.1471285\

### singlet ClSc-C<sub>8</sub>H<sub>8</sub>-ScCl

Charge = 0 Multiplicity = 1

|    |             |             |             |
|----|-------------|-------------|-------------|
| C  | 0.00049100  | -1.14912700 | 1.46140700  |
| C  | -0.00011000 | 0.22043900  | 1.84615400  |
| C  | -0.00075800 | 1.46118500  | 1.14956900  |
| C  | 0.00428400  | -1.84573900 | 0.22066800  |
| C  | -0.00426600 | 1.84595300  | -0.21999900 |
| C  | 0.00049600  | -1.46094400 | -1.14888200 |
| C  | 0.00011500  | -0.22022800 | -1.84552200 |
| H  | 0.00260100  | -1.82627600 | 2.32152500  |
| H  | -0.00022300 | 0.34993300  | 2.93312900  |
| H  | -0.00291500 | 2.32129800  | 1.82672300  |
| H  | 0.00401400  | -2.93270700 | 0.35015900  |
| H  | 0.00249700  | -2.32106500 | -1.82603400 |
| C  | -0.00017700 | 1.14932300  | -1.46071800 |
| H  | -0.00397300 | 2.93292000  | -0.34949900 |
| H  | -0.00206900 | 1.82648100  | -2.32083400 |
| H  | 0.00026000  | -0.34972200 | -2.93248700 |
| Sc | -1.58821100 | -0.00188600 | 0.00041600  |
| Sc | 1.58819300  | 0.00208000  | 0.00018900  |
| Cl | 3.92764800  | -0.00012500 | -0.00093100 |
| Cl | -3.92766300 | -0.00047000 | -0.00091900 |

State=1-A\HF=-2750.6119926\RMSD=6.990e-09\RMSF=4.888e-04\ZeroPoint=0.1346807\Thermal=0.1477434\

### triplet ClSc-C<sub>8</sub>H<sub>8</sub>-ScCl

Charge = 0 Multiplicity = 3

|   |             |             |             |
|---|-------------|-------------|-------------|
| C | -1.22358800 | 0.28675900  | -1.37230100 |
| C | -0.92479200 | 1.46367900  | -0.62526300 |
| C | -0.09638100 | 1.79584500  | 0.48546000  |
| C | -0.68046400 | -1.03760800 | -1.42057000 |
| C | 0.68048500  | 1.03865200  | 1.42098200  |

|    |             |             |             |
|----|-------------|-------------|-------------|
| C  | 0.09639700  | -1.79479900 | -0.48504400 |
| C  | 0.92479000  | -1.46264400 | 0.62569800  |
| H  | -1.92199300 | 0.48585800  | -2.18694600 |
| H  | -1.47348600 | 2.33131900  | -0.99683700 |
| H  | -0.18817900 | 2.84651000  | 0.76581100  |
| H  | -1.08599800 | -1.64138700 | -2.23403900 |
| H  | 0.18818100  | -2.84546800 | -0.76538600 |
| C  | 1.22359300  | -0.28572300 | 1.37273200  |
| H  | 1.08601100  | 1.64242900  | 2.23445700  |
| H  | 1.92197700  | -0.48482900 | 2.18739300  |
| H  | 1.47346000  | -2.33029200 | 0.99728900  |
| Sc | 1.20973200  | 0.28769800  | -1.09995000 |
| Sc | -1.20972100 | -0.28661900 | 1.10033100  |
| Cl | 2.97247000  | 0.76425400  | -2.56108200 |
| Cl | -2.97249800 | -0.76313400 | 2.56142800  |

HF=-2750.5900112\S2=2.006468\S2-1=0.\S2A=2.000021\RMSD=5.980e-09\RMSF=3.574e-05\ZeroPoint=0.132276\Thermal=0.146618\

#### singlet BrSc-C<sub>8</sub>H<sub>8</sub>-ScBr

Charge = 0 Multiplicity = 1

|    |             |             |             |
|----|-------------|-------------|-------------|
| C  | -0.00128600 | 1.34998000  | -1.27639000 |
| C  | 0.00000300  | 1.85741300  | 0.05169900  |
| C  | 0.00087200  | 1.27698500  | 1.34959900  |
| C  | -0.00257500 | 0.05207400  | -1.85679100 |
| C  | 0.00257200  | -0.05111200 | 1.85700700  |
| C  | -0.00090800 | -1.27602600 | -1.34938700 |
| C  | -0.00000700 | -1.85644100 | -0.05148300 |
| H  | -0.00273100 | 2.14412300  | -2.02879800 |
| H  | -0.00016800 | 2.95101000  | 0.08121900  |
| H  | 0.00239300  | 2.02936600  | 2.14376700  |
| H  | -0.00307500 | 0.08158700  | -2.95038800 |
| H  | -0.00242600 | -2.02840800 | -2.14355100 |
| C  | 0.00131200  | -1.34902100 | 1.27660800  |
| H  | 0.00307000  | -0.08062600 | 2.95060400  |
| H  | 0.00275300  | -2.14316600 | 2.02901100  |
| H  | 0.00016100  | -2.95003800 | -0.08100400 |
| Sc | 1.57897000  | 0.00044600  | -0.00146000 |
| Sc | -1.57896700 | 0.00045900  | 0.00166200  |
| Br | 4.07846500  | -0.00061200 | -0.00024400 |
| Br | -4.07846300 | -0.00070100 | -0.00005000 |

State=1-A\HF=-6978.0990047\RMSD=7.446e-09\RMSF=3.052e-04\ZeroPoint=0.1342741\Thermal=0.1477212\

#### triplet BrSc-C<sub>8</sub>H<sub>8</sub>-ScBr

Charge = 0 Multiplicity = 3

|   |             |            |             |
|---|-------------|------------|-------------|
| C | -1.22293200 | 0.28680200 | -1.37420400 |
| C | -0.92410000 | 1.46372400 | -0.62721100 |



|    |             |             |             |
|----|-------------|-------------|-------------|
| C  | -0.09239200 | 1.79635700  | 0.48190100  |
| C  | -0.68434400 | -1.03949800 | -1.41788500 |
| C  | 0.68436700  | 1.04054100  | 1.41829800  |
| C  | 0.09240900  | -1.79531300 | -0.48148400 |
| C  | 0.92409900  | -1.46269100 | 0.62764700  |
| H  | -1.92060000 | 0.48566100  | -2.18953700 |
| H  | -1.47164100 | 2.33184800  | -0.99942700 |
| H  | -0.18163900 | 2.84797000  | 0.75968100  |
| H  | -1.08993700 | -1.64404500 | -2.23073500 |
| H  | 0.18164000  | -2.84693100 | -0.75925300 |
| C  | 1.22293800  | -0.28576700 | 1.37463500  |
| H  | 1.08995200  | 1.64508500  | 2.23115300  |
| H  | 1.92058500  | -0.48463300 | 2.18998400  |
| H  | 1.47161300  | -2.33082400 | 0.99988300  |
| Sc | 1.20306500  | 0.28841500  | -1.09720600 |
| Sc | -1.20305300 | -0.28733300 | 1.09758400  |
| Br | -3.08871600 | -0.81748600 | 2.64658100  |
| Br | 3.08868300  | 0.81861800  | -2.64624400 |

HF=-6978.0755978\S2=2.006859\S2-1=0.\S2A=2.000024\RMSD=4.060e-09\RMSF=8.549e-06\ZeroPoint=0.1317902\Thermal=0.1464534\

## 5. The detailed Cartesian coordinates of XSc-C<sub>8</sub>H<sub>8</sub>-ScX (X = F, Cl, Br) obtained at PBEPBE/ TZVPD level.

### singlet FSc-C<sub>8</sub>H<sub>8</sub>-ScF

Charge = 0 Multiplicity = 1

|    |             |             |             |
|----|-------------|-------------|-------------|
| C  | -0.00072200 | 1.34683500  | -1.27482200 |
| C  | 0.00010000  | 1.85318900  | 0.05095900  |
| C  | 0.00087300  | 1.27498600  | 1.34673200  |
| C  | -0.00166900 | 0.05106400  | -1.85301900 |
| C  | 0.00166900  | -0.05080000 | 1.85307800  |
| C  | -0.00088900 | -1.27472400 | -1.34667400 |
| C  | -0.00010100 | -1.85292300 | -0.05090000 |
| H  | -0.00149500 | 2.14251800  | -2.02751200 |
| H  | 0.00014000  | 2.94813000  | 0.08132500  |
| H  | 0.00171200  | 2.02767200  | 2.14241900  |
| H  | -0.00212400 | 0.08142500  | -2.94796100 |
| H  | -0.00172700 | -2.02741200 | -2.14236000 |
| C  | 0.00073800  | -1.34657300 | 1.27488200  |
| H  | 0.00212400  | -0.08116300 | 2.94802000  |
| H  | 0.00151200  | -2.14225800 | 2.02757200  |
| H  | -0.00014000 | -2.94786600 | -0.08126600 |
| Sc | 1.62370400  | 0.00007100  | -0.00093800 |
| Sc | -1.62370400 | 0.00011000  | 0.00097800  |
| F  | -3.52291000 | -0.00058100 | 0.00022700  |
| F  | 3.52291000  | -0.00066200 | -0.00050600 |

State=1-A\HF=-2030.1291603\RMSD=4.868e-09\RMSF=1.799e-04\ZeroPoint=0.134054\Thermal=0.1477516\

**triplet FSc-C<sub>8</sub>H<sub>8</sub>-ScF**

Charge = 0 Multiplicity = 3

|    |             |             |             |
|----|-------------|-------------|-------------|
| C  | 0.24584200  | 0.71361900  | 1.70129600  |
| C  | 0.25476100  | -0.70240700 | 1.70624900  |
| C  | 0.20940600  | -1.71505400 | 0.69369600  |
| C  | 0.19042900  | 1.71976200  | 0.68313000  |
| C  | -0.19042900 | -1.71976100 | -0.68313100 |
| C  | -0.20940700 | 1.71505400  | -0.69369600 |
| C  | -0.25476300 | 0.70240800  | -1.70624800 |
| H  | 0.41636300  | 1.13605400  | 2.69349000  |
| H  | 0.42984400  | -1.11633700 | 2.70118700  |
| H  | 0.30621300  | -2.72026200 | 1.10951600  |
| H  | 0.27593900  | 2.72779400  | 1.09469400  |
| H  | -0.30621700 | 2.72026200  | -1.10951500 |
| C  | -0.24583900 | -0.71361700 | -1.70129600 |
| H  | -0.27593700 | -2.72779300 | -1.09469500 |
| H  | -0.41635900 | -1.13605200 | -2.69349100 |
| H  | -0.42984700 | 1.11633900  | -2.70118700 |
| Sc | 1.69144600  | 0.00303500  | -0.10285100 |
| Sc | -1.69144600 | -0.00303500 | 0.10285100  |
| F  | -3.57115400 | -0.00592100 | 0.18795000  |
| F  | 3.57115400  | 0.00592000  | -0.18795000 |

State=3-A\S2-1=0.\S2A=2.000016\RMSD=6.425e-10\RMSF=2.089e-05\ZeroPoint=0.1327853\Thermal=0.146969\

**singlet ClSc-C<sub>8</sub>H<sub>8</sub>-ScCl**

Charge = 0 Multiplicity = 1

|    |             |             |             |
|----|-------------|-------------|-------------|
| C  | 0.00020700  | -1.36150400 | 1.26254700  |
| C  | 0.00004400  | -0.06979500 | 1.85574600  |
| C  | -0.00015100 | 1.26250300  | 1.36156600  |
| C  | 0.00052800  | -1.85569100 | -0.06974700 |
| C  | -0.00052800 | 1.85571000  | 0.06986200  |
| C  | 0.00014900  | -1.26248400 | -1.36145000 |
| C  | -0.00004400 | 0.06981400  | -1.85563000 |
| H  | 0.00049100  | -2.16423500 | 2.00781400  |
| H  | 0.00006800  | -0.11059800 | 2.95028200  |
| H  | -0.00039400 | 2.00775900  | 2.16430700  |
| H  | 0.00061800  | -2.95022600 | -0.11055100 |
| H  | 0.00039100  | -2.00774000 | -2.16419200 |
| C  | -0.00020500 | 1.36152200  | -1.26243200 |
| H  | -0.00061800 | 2.95024500  | 0.11066500  |
| H  | -0.00048900 | 2.16425300  | -2.00769900 |
| H  | -0.00006800 | 0.11061600  | -2.95016600 |
| Cl | 3.92324000  | 0.00000700  | -0.00016300 |
| Cl | -3.92324000 | -0.00005800 | -0.00015900 |
| Sc | -1.58390300 | -0.00029900 | 0.00007500  |
| Sc | 1.58390300  | 0.00031600  | 0.00003100  |

State=1-A\HF=-2750.6076809\RMSD=4.575e-09\RMSF=6.472e-05\ZeroPoint=  
0.1344589\Thermal=0.1476585\

**triplet ClSc-C<sub>8</sub>H<sub>8</sub>-ScCl**

Charge = 0 Multiplicity = 3

|    |             |             |             |
|----|-------------|-------------|-------------|
| C  | 0.05738700  | -1.31112000 | -1.31868800 |
| C  | -0.01136900 | 0.01411900  | -1.84015700 |
| C  | -0.07944300 | 1.33098900  | -1.30056100 |
| C  | 0.25466300  | -1.86953900 | -0.01483100 |
| C  | -0.25466900 | 1.86954300  | 0.01483300  |
| C  | 0.07944000  | -1.33098400 | 1.30056300  |
| C  | 0.01137000  | -0.01411400 | 1.84016000  |
| H  | 0.11393200  | -2.06006400 | -2.11139500 |
| H  | -0.01968700 | 0.02099400  | -2.93251100 |
| H  | -0.15005200 | 2.09120900  | -2.08123300 |
| H  | 0.38501300  | -2.95356600 | -0.02403400 |
| H  | 0.15004800  | -2.09120500 | 2.08123500  |
| C  | -0.05738700 | 1.31112600  | 1.31869000  |
| H  | -0.38502300 | 2.95356900  | 0.02403600  |
| H  | -0.11393200 | 2.06006900  | 2.11139700  |
| H  | 0.01969000  | -0.02098800 | 2.93251300  |
| Sc | 1.66284400  | -0.01196600 | -0.00367900 |
| Sc | -1.66284200 | 0.01196700  | 0.00368300  |
| Cl | 3.99845500  | 0.08896300  | -0.00383500 |
| Cl | -3.99845400 | -0.08897100 | 0.00382700  |

State=3-A\HF=-2750.5860311\S2=2.006443\S2-1=0.\S2A=2.000021\RMSD=2.048e-  
09\RMSF=3.339e-05\ZeroPoint=0.1320957\

**singlet BrSc-C<sub>8</sub>H<sub>8</sub>-ScBr**

Charge = 0 Multiplicity = 1

|    |             |             |             |
|----|-------------|-------------|-------------|
| C  | 0.00103100  | -1.21838500 | 1.40209000  |
| C  | -0.00002900 | 0.12976800  | 1.85330000  |
| C  | -0.00100200 | 1.40181700  | 1.21886100  |
| C  | 0.00171500  | -1.85282500 | 0.13004300  |
| C  | -0.00171400 | 1.85302800  | -0.12929100 |
| C  | 0.00099800  | -1.40161300 | -1.21810800 |
| C  | 0.00003000  | -0.12956600 | -1.85254700 |
| H  | 0.00184400  | -1.93727900 | 2.22859200  |
| H  | -0.00000700 | 0.20616900  | 2.94601900  |
| H  | -0.00187000 | 2.22831600  | 1.93775800  |
| H  | 0.00252600  | -2.94554300 | 0.20644300  |
| H  | 0.00186700  | -2.22811100 | -1.93700500 |
| C  | -0.00102500 | 1.21858500  | -1.40133800 |
| H  | -0.00252500 | 2.94574500  | -0.20569400 |
| H  | -0.00183900 | 1.93747900  | -2.22784000 |
| H  | 0.00000700  | -0.20596700 | -2.94526400 |
| Sc | -1.57461100 | -0.00118900 | 0.00045000  |

|    |             |             |             |
|----|-------------|-------------|-------------|
| Sc | 1.57461100  | 0.00138100  | 0.00026300  |
| Br | -4.07114400 | -0.00019200 | -0.00051300 |
| Br | 4.07114300  | -0.00008400 | -0.00051600 |

State=1-A\HF=-6978.0948374\RMSD=2.253e-09\RMSF=1.315e-04\ZeroPoint=0.1341319\Thermal=0.1475675\

**triplet BrSc-C<sub>8</sub>H<sub>8</sub>-ScBr**

Charge = 0 Multiplicity = 3

|    |             |             |             |
|----|-------------|-------------|-------------|
| C  | -0.03654200 | -1.32910100 | 1.30332200  |
| C  | -0.00082100 | -0.00875600 | 1.83970300  |
| C  | 0.03455500  | 1.31659100  | 1.31541000  |
| C  | -0.20737500 | -1.87659400 | -0.00881500 |
| C  | 0.20737900  | 1.87659600  | 0.00881500  |
| C  | -0.03455200 | -1.31659000 | -1.31540900 |
| C  | 0.00082200  | 0.00875700  | -1.83970300 |
| H  | -0.08190300 | -2.08829200 | 2.08694300  |
| H  | -0.00156800 | -0.01366000 | 2.93217400  |
| H  | 0.07860500  | 2.06845200  | 2.10615300  |
| H  | -0.31154800 | -2.96345200 | -0.01404900 |
| H  | -0.07860100 | -2.06845100 | -2.10615300 |
| C  | 0.03654300  | 1.32910300  | -1.30332100 |
| H  | 0.31155400  | 2.96345300  | 0.01404900  |
| H  | 0.08190200  | 2.08829300  | -2.08694300 |
| H  | 0.00156700  | 0.01366100  | -2.93217300 |
| Sc | -1.65535100 | -0.05132300 | -0.00001000 |
| Sc | 1.65535100  | 0.05132300  | 0.00000900  |
| Br | 4.15060700  | -0.04089200 | 0.00011300  |
| Br | -4.15060900 | 0.04089100  | -0.00011300 |

State=3-A\HF=-6978.071461\S2=2.006826\S2-1=0.\S2A=2.000024\RMSD=2.479e-09\RMSF=1.112e-05\ZeroPoint=0.1316826\Thermal=0.1463371\

**6. The detailed Cartesian coordinates of XSc-C<sub>8</sub>H<sub>8</sub>-ScX (X = F, Cl, Br) obtained at BP86/TZVP level.**

**singlet FSc-C<sub>8</sub>H<sub>8</sub>-ScF**

Charge = 0 Multiplicity = 1

|   |             |             |             |
|---|-------------|-------------|-------------|
| C | 0.04598600  | -1.31051300 | -1.31841900 |
| C | -0.00178900 | -1.86115700 | -0.00809100 |
| C | -0.04791800 | -1.32205600 | 1.30681300  |
| C | -0.06364300 | 0.00818000  | -1.85579800 |
| C | 0.06363500  | -0.00817400 | 1.85579900  |
| C | 0.04791200  | 1.32206100  | -1.30681200 |
| C | 0.00178000  | 1.86116300  | 0.00809300  |
| H | 0.01115800  | -2.07815300 | -2.09733200 |
| H | -0.00256900 | -2.95542800 | -0.01273500 |
| H | -0.01473200 | -2.09649000 | 2.07903600  |
| H | -0.01848600 | 0.01272500  | -2.94888100 |
| H | 0.01472800  | 2.09649500  | -2.07903400 |

|    |             |             |             |
|----|-------------|-------------|-------------|
| C  | -0.04599400 | 1.31051900  | 1.31842000  |
| H  | 0.01848000  | -0.01271900 | 2.94888300  |
| H  | -0.01116400 | 2.07815900  | 2.09733400  |
| H  | 0.00256300  | 2.95543400  | 0.01273600  |
| Sc | -1.63714300 | 0.00125200  | -0.00438300 |
| Sc | 1.63712600  | -0.00124800 | 0.00438500  |
| F  | 3.53428900  | -0.00024400 | -0.00379000 |
| F  | -3.53422700 | 0.00021600  | 0.00378200  |

State=1-A\HF=-2031.3031605\RMSD=2.933e-09\RMSF=1.156e-04\ZeroPoint=0.1336631\Thermal=0.1458701\

### triplet FSc-C<sub>8</sub>H<sub>8</sub>-ScF

Charge = 0 Multiplicity = 3

|    |             |             |             |
|----|-------------|-------------|-------------|
| C  | -1.25489200 | 0.28060900  | -1.34253000 |
| C  | -0.92104100 | 1.46744700  | -0.62827800 |
| C  | -0.05421700 | 1.80749300  | 0.45012300  |
| C  | -0.72860900 | -1.05103700 | -1.37719300 |
| C  | 0.73659600  | 1.05518300  | 1.37766700  |
| C  | 0.06318100  | -1.80304900 | -0.45025300 |
| C  | 0.93055400  | -1.46280000 | 0.62769000  |
| H  | -1.97153200 | 0.47122900  | -2.14384600 |
| H  | -1.46843700 | 2.33582300  | -1.00101400 |
| H  | -0.12246800 | 2.86451300  | 0.71472200  |
| H  | -1.17800500 | -1.66903200 | -2.15703500 |
| H  | 0.13156700  | -2.86002300 | -0.71499100 |
| C  | 1.26380900  | -0.27609400 | 1.34235600  |
| H  | 1.18536600  | 1.67298900  | 2.15801700  |
| H  | 1.98061500  | -0.46668200 | 2.14353300  |
| H  | 1.47859800  | -2.33104600 | 0.99977400  |
| Sc | 1.22920600  | 0.26227000  | -1.19905800 |
| Sc | -1.22052800 | -0.25803400 | 1.19848600  |
| F  | -2.56393600 | -0.57781800 | 2.47802400  |
| F  | 2.57216800  | 0.58250600  | -2.47896300 |

HF=-2031.2938139\S2=2.007761\S2-1=0.\S2A=2.000028\RMSD=3.211e-09\RMSF=2.607e-05\ZeroPoint=0.1328758\Thermal=0.1462445\

### singlet ClSc-C<sub>8</sub>H<sub>8</sub>-ScCl

Charge = 0 Multiplicity = 1

|   |             |             |             |
|---|-------------|-------------|-------------|
| C | -0.00372000 | -1.32228200 | -1.30895000 |
| C | 0.00094400  | -0.00933100 | -1.86009900 |
| C | 0.00511300  | 1.30917800  | -1.32204900 |
| C | -0.00426700 | -1.86087900 | 0.00933200  |
| C | 0.00426700  | 1.86088100  | -0.00932600 |
| C | -0.00511400 | -1.30917500 | 1.32205500  |
| C | -0.00094400 | 0.00933300  | 1.86010500  |
| H | -0.00545000 | -2.10032500 | -2.07951800 |
| H | 0.00152800  | -0.01489000 | -2.95516300 |

|    |             |             |             |
|----|-------------|-------------|-------------|
| H  | 0.00771700  | 2.07919300  | -2.10063600 |
| H  | -0.00583900 | -2.95588700 | 0.01489300  |
| H  | -0.00771700 | -2.07919100 | 2.10064300  |
| C  | 0.00371900  | 1.32228400  | 1.30895600  |
| H  | 0.00583900  | 2.95588900  | -0.01488700 |
| H  | 0.00545000  | 2.10032700  | 2.07952400  |
| H  | -0.00152900 | 0.01489200  | 2.95516900  |
| Sc | 1.59940100  | -0.00410800 | 0.00079000  |
| Sc | -1.59940200 | 0.00410900  | -0.00078500 |
| Cl | -3.93632800 | 0.00035600  | -0.00008500 |
| Cl | 3.93633000  | -0.00036100 | 0.00006900  |

State=1-A\HF=-2752.0606839\RMSD=2.287e-09\RMSF=7.704e-05\ZeroPoint=0.1344639\Thermal=0.147704\

### triplet ClSc-C<sub>8</sub>H<sub>8</sub>-ScCl

Charge = 0 Multiplicity = 3

|    |             |             |             |
|----|-------------|-------------|-------------|
| C  | -1.26646300 | 0.27716100  | -1.33265100 |
| C  | -0.92519700 | 1.46802200  | -0.62503100 |
| C  | -0.05056400 | 1.81061700  | 0.44747900  |
| C  | -0.74959700 | -1.05817600 | -1.36268200 |
| C  | 0.75788500  | 1.06258500  | 1.36318400  |
| C  | 0.05955700  | -1.80602900 | -0.44748000 |
| C  | 0.93443700  | -1.46333400 | 0.62479800  |
| H  | -1.99258600 | 0.46532900  | -2.12636300 |
| H  | -1.47631700 | 2.33541000  | -0.99561100 |
| H  | -0.11469300 | 2.86887900  | 0.70917400  |
| H  | -1.20119900 | -1.67641200 | -2.14135200 |
| H  | 0.12374600  | -2.86426100 | -0.70927400 |
| C  | 1.27547500  | -0.27248400 | 1.33255100  |
| H  | 1.20899600  | 1.68066500  | 2.14226500  |
| H  | 2.00180100  | -0.46062600 | 2.12608800  |
| H  | 1.48624900  | -2.33054200 | 0.99476700  |
| Sc | 1.20069400  | 0.24980500  | -1.17772600 |
| Sc | -1.19186900 | -0.24549200 | 1.17723600  |
| Cl | -2.88636000 | -0.64669200 | 2.73565400  |
| Cl | 2.89400100  | 0.65002200  | -2.73779300 |

HF=-2752.0410176\S2=2.008379\S2-1=0.\S2A=2.000035\RMSD=2.826e-09\RMSF=3.389e-05\ZeroPoint=0.1321546\Thermal=0.1466272\

### singlet BrSc-C<sub>8</sub>H<sub>8</sub>-ScBr

Charge = 0 Multiplicity = 1

|   |             |             |             |
|---|-------------|-------------|-------------|
| C | -0.00319900 | -1.34068300 | -1.29099400 |
| C | 0.00100400  | -0.03506200 | -1.86081400 |
| C | 0.00466500  | 1.29112300  | -1.34054400 |
| C | -0.00083300 | -1.86108200 | 0.03507100  |
| C | 0.00083400  | 1.86108600  | -0.03505800 |
| C | -0.00466400 | -1.29111900 | 1.34055700  |

|    |             |             |             |
|----|-------------|-------------|-------------|
| C  | -0.00100400 | 0.03506600  | 1.86082600  |
| H  | -0.00422900 | -2.12943800 | -2.05076600 |
| H  | 0.00157500  | -0.05569900 | -2.95577900 |
| H  | 0.00660400  | 2.05060500  | -2.12957800 |
| H  | -0.00505300 | -2.95602800 | 0.05571400  |
| H  | -0.00660400 | -2.05060100 | 2.12959000  |
| C  | 0.00319900  | 1.34068700  | 1.29100600  |
| H  | 0.00505300  | 2.95603300  | -0.05570100 |
| H  | 0.00423000  | 2.12944200  | 2.05077900  |
| H  | -0.00157500 | 0.05570300  | 2.95579100  |
| Sc | 1.58953900  | -0.00225800 | 0.00085100  |
| Sc | -1.58953900 | 0.00226100  | -0.00083900 |
| Br | -4.07931800 | 0.00022800  | -0.00005200 |
| Br | 4.07931800  | -0.00023300 | 0.00003500  |

State=1-A\HF=-6980.4125772\RMSD=2.810e-09\RMSF=1.093e-04\ZeroPoint=0.134063\Thermal=0.1475615\

### triplet BrSc-C<sub>8</sub>H<sub>8</sub>-ScBr

Charge = 0 Multiplicity = 3

|    |             |             |             |
|----|-------------|-------------|-------------|
| C  | -1.26786200 | 0.27701200  | -1.33182000 |
| C  | -0.92644100 | 1.46857900  | -0.62472700 |
| C  | -0.05064600 | 1.81109200  | 0.44730900  |
| C  | -0.75322700 | -1.05920500 | -1.35976200 |
| C  | 0.76155100  | 1.06360300  | 1.36016200  |
| C  | 0.05964500  | -1.80652700 | -0.44741100 |
| C  | 0.93563100  | -1.46392600 | 0.62442100  |
| H  | -1.99424500 | 0.46472100  | -2.12548100 |
| H  | -1.47820200 | 2.33584200  | -0.99485700 |
| H  | -0.11480900 | 2.86925300  | 0.70960200  |
| H  | -1.20412100 | -1.67722300 | -2.13909000 |
| H  | 0.12381000  | -2.86467100 | -0.70976200 |
| C  | 1.27687500  | -0.27236000 | 1.33164000  |
| H  | 1.21204400  | 1.68150900  | 2.13981500  |
| H  | 2.00338200  | -0.46008600 | 2.12518500  |
| H  | 1.48800700  | -2.33101900 | 0.99403500  |
| Sc | 1.19539400  | 0.24894200  | -1.17340000 |
| Sc | -1.18659300 | -0.24455900 | 1.17305400  |
| Br | -2.99386700 | -0.66829600 | 2.83724500  |
| Br | 3.00167200  | 0.67176600  | -2.83892800 |

HF=-2752.0410176\S2=2.008379\S2-1=0.\S2A=2.000035\RMSD=2.826e-09\RMSF=3.389e-05\ZeroPoint=0.1321546\Thermal=0.1466272\

## 7. The detailed Cartesian coordinates of XSc-C<sub>8</sub>H<sub>8</sub>-ScX (X = F, Cl, Br) obtained at MPW91PW91/ TZVP level.

### singlet FSc-C<sub>8</sub>H<sub>8</sub>-ScF

Charge = 0 Multiplicity = 1

|   |            |             |             |
|---|------------|-------------|-------------|
| C | 0.00276300 | -1.29871300 | -1.30969700 |
|---|------------|-------------|-------------|

|    |             |             |             |
|----|-------------|-------------|-------------|
| C  | -0.00043700 | -1.84449100 | -0.00778900 |
| C  | -0.00355500 | -1.30986200 | 1.29855500  |
| C  | 0.00490000  | 0.00778800  | -1.84389800 |
| C  | -0.00493900 | -0.00778600 | 1.84389900  |
| C  | 0.00351600  | 1.30986300  | -1.29855300 |
| C  | 0.00039900  | 1.84449300  | 0.00779100  |
| H  | 0.00270800  | -2.06261000 | -2.08028300 |
| H  | -0.00078700 | -2.92954100 | -0.01231300 |
| H  | -0.00384600 | -2.08004600 | 2.06285600  |
| H  | 0.00621800  | 0.01231100  | -2.92894800 |
| H  | 0.00380500  | 2.08004800  | -2.06285400 |
| C  | -0.00280200 | 1.29871500  | 1.30969800  |
| H  | -0.00626000 | -0.01231000 | 2.92894900  |
| H  | -0.00274800 | 2.06261100  | 2.08028500  |
| H  | 0.00074800  | 2.92954200  | 0.01231400  |
| Sc | -1.60789700 | 0.00037900  | -0.00365700 |
| Sc | 1.60786000  | -0.00037800 | 0.00365700  |
| F  | 3.50328400  | -0.00009400 | 0.00038400  |
| F  | -3.50307700 | 0.00008600  | -0.00038800 |

State=1-A\HF=-2031.0672884\RMSD=2.009e-09\RMSF=7.216e-05\ZeroPoint=0.1402169\Thermal=0.1529725\

### triplet FSc-C<sub>8</sub>H<sub>8</sub>-ScF

Charge = 0 Multiplicity = 3

|    |             |             |             |
|----|-------------|-------------|-------------|
| C  | -1.25766000 | 0.20894100  | -1.30002600 |
| C  | -0.99769600 | 1.38745700  | -0.54759100 |
| C  | -0.03242800 | 1.78658200  | 0.41078200  |
| C  | -0.73021400 | -1.09660900 | -1.38302200 |
| C  | 0.86604200  | 1.06041200  | 1.22223100  |
| C  | 0.15683100  | -1.81306800 | -0.58199300 |
| C  | 0.84814300  | -1.49522100 | 0.60571700  |
| H  | -2.00060400 | 0.39830900  | -2.06372400 |
| H  | -1.56608700 | 2.22899600  | -0.92117000 |
| H  | -0.04053200 | 2.84913200  | 0.61278300  |
| H  | -1.11359400 | -1.65368500 | -2.22896400 |
| H  | 0.33789900  | -2.82691200 | -0.91707800 |
| C  | 1.12088400  | -0.32624000 | 1.36795400  |
| H  | 1.41147900  | 1.67459200  | 1.92590500  |
| H  | 1.83285500  | -0.52507200 | 2.15811700  |
| H  | 1.38466300  | -2.34596700 | 1.00499000  |
| Sc | 1.25849500  | 0.31408400  | -1.11299800 |
| Sc | -1.32922700 | -0.06727400 | 1.42046000  |
| F  | -2.69630300 | -0.43733600 | 2.65042300  |
| F  | 2.63504900  | 0.72333000  | -2.32556500 |

State=3-A\HF=-2031.0571035\S2=2.008214\S2-1=0.\S2A=2.000033\RMSD=7.645e-10\RMSF=1.295e-05\ZeroPoint=0.1393432\Thermal=0.1527397\



**singlet ClSc-C<sub>8</sub>H<sub>8</sub>-ScCl**

Charge = 0 Multiplicity = 1

|    |             |             |             |
|----|-------------|-------------|-------------|
| C  | -0.00546100 | -1.32096500 | -1.29145500 |
| C  | 0.00108400  | -0.02085300 | -1.84723200 |
| C  | 0.00703900  | 1.29154400  | -1.32086600 |
| C  | -0.00566700 | -1.84744400 | 0.02085600  |
| C  | 0.00566600  | 1.84744600  | -0.02084900 |
| C  | -0.00704000 | -1.29154200 | 1.32087200  |
| C  | -0.00108500 | 0.02085500  | 1.84723900  |
| H  | -0.00813400 | -2.09675800 | -2.05010200 |
| H  | 0.00173800  | -0.03316300 | -2.93224600 |
| H  | 0.01069100  | 2.04991100  | -2.09692800 |
| H  | -0.01099100 | -2.93244100 | 0.03316700  |
| H  | -0.01069200 | -2.04990900 | 2.09693500  |
| C  | 0.00546000  | 1.32096700  | 1.29146100  |
| H  | 0.01098900  | 2.93244300  | -0.03316100 |
| H  | 0.00813200  | 2.09676000  | 2.05010800  |
| H  | -0.00173900 | 0.03316500  | 2.93225200  |
| Sc | 1.56730700  | -0.00572200 | 0.00094600  |
| Sc | -1.56730700 | 0.00572300  | -0.00094000 |
| Cl | -3.90108100 | 0.00065000  | -0.00010500 |
| Cl | 3.90108400  | -0.00065600 | 0.00008800  |

State=1-A\HF=-2751.834374\RMSD=7.157e-09\RMSF=8.345e-05\ZeroPoint=0.1401503\  
Thermal=0.152797\

**triplet ClSc-C<sub>8</sub>H<sub>8</sub>-ScCl**

Charge = 0 Multiplicity = 3

|    |             |             |             |
|----|-------------|-------------|-------------|
| C  | -1.19728900 | 0.29400800  | -1.35919800 |
| C  | -0.91978600 | 1.46250700  | -0.62563100 |
| C  | -0.10282300 | 1.77395000  | 0.47724000  |
| C  | -0.83215000 | -1.06019600 | -1.24393600 |
| C  | 0.84108300  | 1.06611500  | 1.24433300  |
| C  | 0.02337500  | -1.79041200 | -0.39800700 |
| C  | 0.93079500  | -1.45620200 | 0.62461400  |
| H  | -1.91163900 | 0.46402900  | -2.15422200 |
| H  | -1.46276400 | 2.32247900  | -0.99489000 |
| H  | -0.15598000 | 2.82015400  | 0.74906200  |
| H  | -1.32555700 | -1.68664900 | -1.97527800 |
| H  | 0.04419800  | -2.84477900 | -0.64118200 |
| C  | 1.29311800  | -0.26592800 | 1.28246200  |
| H  | 1.33158000  | 1.69169100  | 1.97839700  |
| H  | 2.04274100  | -0.42684400 | 2.04629300  |
| H  | 1.47591100  | -2.31549900 | 0.99222500  |
| Sc | 1.31855700  | 0.33273300  | -1.16891600 |
| Sc | -1.31316400 | -0.32952500 | 1.16691200  |
| Cl | -3.02431500 | -0.77164800 | 2.68738500  |
| Cl | 3.03210600  | 0.76446800  | -2.69043200 |

State=3-A\HF=-2751.8184038\S2=2.008568\S2-1=0.\S2A=2.000044\RMSD=5.964e-10\  
RMSF=7.915e-05\ZeroPoint=0.1393884\Thermal=0.1530761\

**singlet BrSc-C<sub>8</sub>H<sub>8</sub>-ScBr**

Charge = 0 Multiplicity = 1

|    |             |             |             |
|----|-------------|-------------|-------------|
| C  | -0.00501600 | -1.31932900 | -1.29415500 |
| C  | 0.00099400  | -0.01784900 | -1.84807200 |
| C  | 0.00645200  | 1.29423100  | -1.31924600 |
| C  | -0.00527000 | -1.84825100 | 0.01785600  |
| C  | 0.00526900  | 1.84825500  | -0.01784400 |
| C  | -0.00645300 | -1.29422700 | 1.31925800  |
| C  | -0.00099500 | 0.01785300  | 1.84808400  |
| H  | -0.00746700 | -2.09403400 | -2.05396300 |
| H  | 0.00159200  | -0.02846300 | -2.93316000 |
| H  | 0.00980200  | 2.05386500  | -2.09411900 |
| H  | -0.01011200 | -2.93333100 | 0.02847200  |
| H  | -0.00980200 | -2.05386100 | 2.09413100  |
| C  | 0.00501500  | 1.31933200  | 1.29416700  |
| H  | 0.01011100  | 2.93333400  | -0.02846000 |
| H  | 0.00746700  | 2.09403700  | 2.05397500  |
| H  | -0.00159300 | 0.02846700  | 2.93317200  |
| Sc | 1.55917600  | -0.00510500 | 0.00086400  |
| Sc | -1.55917500 | 0.00510900  | -0.00085400 |
| Br | -4.04580700 | 0.00032400  | -0.00004800 |
| Br | 4.04580800  | -0.00032900 | 0.00003300  |

State=1-A\HF=-6980.0650993\RMSD=4.488e-09\RMSF=8.224e-05\ZeroPoint=0.139731\  
Thermal=0.1526576\

**triplet BrSc-C<sub>8</sub>H<sub>8</sub>-ScBr**

Charge = 0 Multiplicity = 3

|    |             |             |             |
|----|-------------|-------------|-------------|
| C  | -1.26559200 | 0.26635500  | -1.31875900 |
| C  | -0.91695600 | 1.45356600  | -0.64132600 |
| C  | -0.06269100 | 1.78807400  | 0.43593800  |
| C  | -0.80172500 | -1.06619500 | -1.30181600 |
| C  | 0.83525900  | 1.06478700  | 1.25562200  |
| C  | 0.04281000  | -1.79564000 | -0.43860100 |
| C  | 0.93261100  | -1.46294600 | 0.60386400  |
| H  | -1.96522100 | 0.45131500  | -2.12452100 |
| H  | -1.44386300 | 2.31795600  | -1.02587500 |
| H  | -0.07601900 | 2.84545400  | 0.66690300  |
| H  | -1.23652100 | -1.67581000 | -2.08397600 |
| H  | 0.12104600  | -2.83864500 | -0.71964700 |
| C  | 1.24968800  | -0.28620900 | 1.32295000  |
| H  | 1.35938900  | 1.69764200  | 1.96043900  |
| H  | 2.00828200  | -0.45019200 | 2.07743300  |
| H  | 1.49608700  | -2.31865300 | 0.95441600  |
| Sc | 1.19336300  | 0.29020000  | -1.08470300 |
| Sc | -1.26205600 | -0.24194500 | 1.29478300  |

|    |             |             |             |
|----|-------------|-------------|-------------|
| Br | -3.15094400 | -0.76818800 | 2.85722600  |
| Br | 3.03104600  | 0.77352400  | -2.69311900 |

State=3-A\HF=-6980.0423768\S2=2.012527\S2-1=0.\S2A=2.000074\RMSD=4.242e-09\  
RMSF=1.443e-05\ZeroPoint=0.1385876\Thermal=0.1516734\

**8. The detailed Cartesian coordinates of Sc<sub>2</sub>C<sub>8</sub>H<sub>8</sub>X<sub>2</sub> (X = F, Cl, Br) obtained at PBEPBE/TZVP level.**

**singlet Isomer 2 of X = F**

Charge = 0 Multiplicity = 1

|    |             |             |             |
|----|-------------|-------------|-------------|
| C  | -0.47507200 | -0.00030300 | -1.84388800 |
| C  | -0.52768400 | 1.32542400  | -1.30825100 |
| C  | -0.57210600 | 1.88098800  | -0.00024000 |
| C  | -0.52770000 | -1.32585700 | -1.30783200 |
| C  | -0.52742300 | 1.32585400  | 1.30794100  |
| C  | -0.57209100 | -1.88099100 | 0.00036100  |
| C  | -0.52738600 | -1.32542600 | 1.30836100  |
| H  | -0.49969700 | -0.00047600 | -2.94384300 |
| H  | -0.58400300 | 2.08891100  | -2.09760400 |
| H  | -0.66344500 | 2.97617500  | -0.00041400 |
| H  | -0.58403200 | -2.08959900 | -2.09693600 |
| H  | -0.66342100 | -2.97617900 | 0.00055500  |
| C  | -0.47465900 | 0.00030100  | 1.84398500  |
| H  | -0.58356300 | 2.08959700  | 2.09705900  |
| H  | -0.49902700 | 0.00047500  | 2.94394600  |
| H  | -0.58350200 | -2.08891300 | 2.09772800  |
| Sc | 1.29747000  | 0.00000100  | -0.00015900 |
| Sc | -1.97771600 | -0.00000700 | 0.00021400  |
| F  | 2.45390700  | 1.49446700  | -0.00025200 |
| F  | 2.45393500  | -1.49444400 | -0.00022100 |

State=1-A\HF=-2030.0687531\RMSD=5.831e-09\RMSF=6.127e-05\ZeroPoint=0.1354966\Thermal=0.147571\

**triplet Isomer 2 of X = F**

Charge = 0 Multiplicity = 3

|   |             |             |             |
|---|-------------|-------------|-------------|
| C | -0.42963300 | -0.00030100 | -1.83932700 |
| C | -0.51722400 | 1.31740800  | -1.30560900 |
| C | -0.58369200 | 1.86750700  | -0.00024200 |
| C | -0.51724400 | -1.31783700 | -1.30518900 |
| C | -0.51696300 | 1.31783500  | 1.30528900  |
| C | -0.58366900 | -1.86751000 | 0.00035800  |
| C | -0.51691000 | -1.31741000 | 1.30571000  |
| H | -0.41306400 | -0.00047400 | -2.93216600 |
| H | -0.54639900 | 2.07947300  | -2.08800000 |
| H | -0.66420800 | 2.95703000  | -0.00041400 |
| H | -0.54643300 | -2.08015500 | -2.08733400 |
| H | -0.66417200 | -2.95703400 | 0.00054800  |

|    |             |             |             |
|----|-------------|-------------|-------------|
| C  | -0.42921300 | 0.00030000  | 1.83940700  |
| H  | -0.54597000 | 2.08015300  | 2.08744100  |
| H  | -0.41240800 | 0.00047400  | 2.93224100  |
| H  | -0.54588700 | -2.07947600 | 2.08810800  |
| Sc | 1.36174100  | 0.00000100  | -0.00016100 |
| Sc | -2.14940100 | -0.00001100 | 0.00023300  |
| F  | 2.52479800  | 1.46486400  | -0.00025800 |
| F  | 2.52483600  | -1.46483600 | -0.00022400 |

State=3-A\HF=-2030.0739482\S2=2.004202\S2-1=0.\S2A=2.000009\RMSD=4.752e-09\  
RMSF=5.700e-05\ZeroPoint=0.1358831\Thermal=0.1489057\

**singlet Isomer 2 of X = Cl**

Charge = 0 Multiplicity = 1

|    |             |             |             |
|----|-------------|-------------|-------------|
| C  | -0.84220000 | -0.00031000 | -1.84678700 |
| C  | -0.89213000 | 1.32506100  | -1.31003900 |
| C  | -0.93364200 | 1.87883400  | -0.00026900 |
| C  | -0.89211600 | -1.32551200 | -1.30962300 |
| C  | -0.89183400 | 1.32549200  | 1.30966900  |
| C  | -0.93356400 | -1.87885400 | 0.00032900  |
| C  | -0.89174300 | -1.32507400 | 1.31008700  |
| H  | -0.85770200 | -0.00048500 | -2.94504100 |
| H  | -0.93312500 | 2.09018800  | -2.09619400 |
| H  | -1.00224000 | 2.97378400  | -0.00044800 |
| H  | -0.93310900 | -2.09089400 | -2.09552900 |
| H  | -1.00210700 | -2.97380700 | 0.00053000  |
| C  | -0.84171500 | 0.00029700  | 1.84682000  |
| H  | -0.93260400 | 2.09087300  | 2.09558400  |
| H  | -0.85691200 | 0.00047000  | 2.94507700  |
| H  | -0.93244700 | -2.09020500 | 2.09625100  |
| Sc | 0.88672900  | -0.00000300 | -0.00021300 |
| Sc | -2.32876600 | -0.00004100 | 0.00020100  |
| Cl | 2.36602700  | 1.84373700  | -0.00003600 |
| Cl | 2.36613000  | -1.84365500 | -0.00002800 |

State=1-A\HF=-2750.5307626\RMSD=5.361e-09\RMSF=5.036e-04\ ZeroPoint=0.1345363\  
Thermal=0.1472015\

**triplet Isomer 2 of X = Cl**

Charge = 0 Multiplicity = 3

|   |             |             |             |
|---|-------------|-------------|-------------|
| C | -0.80947500 | -0.00030100 | -1.84258500 |
| C | -0.89424700 | 1.31670100  | -1.30733000 |
| C | -0.96076400 | 1.86509700  | -0.00021500 |
| C | -0.89427000 | -1.31713100 | -1.30690900 |
| C | -0.89399600 | 1.31712800  | 1.30706400  |
| C | -0.96074600 | -1.86510100 | 0.00038500  |
| C | -0.89394800 | -1.31670400 | 1.30748500  |
| H | -0.78700600 | -0.00047500 | -2.93505200 |
| H | -0.91582700 | 2.08107800  | -2.08728900 |

|    |             |             |             |
|----|-------------|-------------|-------------|
| H  | -1.02896600 | 2.95515000  | -0.00038800 |
| H  | -0.91586000 | -2.08175900 | -2.08662100 |
| H  | -1.02893600 | -2.95515400 | 0.00057200  |
| C  | -0.80906700 | 0.00030000  | 1.84272000  |
| H  | -0.91541200 | 2.08175600  | 2.08678100  |
| H  | -0.78637100 | 0.00047400  | 2.93518200  |
| H  | -0.91533800 | -2.08108100 | 2.08744900  |
| Sc | 0.95485800  | -0.00000100 | -0.00011800 |
| Sc | -2.50639500 | -0.00001000 | 0.00025000  |
| Cl | 2.42866600  | 1.81631700  | -0.00022500 |
| Cl | 2.42869000  | -1.81629800 | -0.00019100 |

State=3-A\HF=-2750.5309774\S2=2.004578\S2-1=0.\S2A=2.000011\RMSD=6.483e-09\  
RMSF=3.229e-05\ZeroPoint=0.134545\Thermal=0.148188\

### singlet Isomer 2 of X = Br

Charge = 0 Multiplicity = 1

|    |             |             |             |
|----|-------------|-------------|-------------|
| C  | -1.40330400 | -0.00030900 | -1.85145200 |
| C  | -1.44658400 | 1.32273100  | -1.31138400 |
| C  | -1.48181400 | 1.87377700  | -0.00020200 |
| C  | -1.44658900 | -1.32317400 | -1.31096200 |
| C  | -1.44631200 | 1.32315700  | 1.31115200  |
| C  | -1.48179500 | -1.87379200 | 0.00040100  |
| C  | -1.44628000 | -1.32274400 | 1.31157500  |
| H  | -1.41434600 | -0.00048300 | -2.94992600 |
| H  | -1.47936400 | 2.09214800  | -2.09424200 |
| H  | -1.53451200 | 2.97011300  | -0.00037300 |
| H  | -1.47936500 | -2.09284700 | -2.09356800 |
| H  | -1.53447800 | -2.97012900 | 0.00058500  |
| C  | -1.40288400 | 0.00029600  | 1.85163300  |
| H  | -1.47889400 | 2.09283100  | 2.09376400  |
| H  | -1.41367300 | 0.00047000  | 2.95010900  |
| H  | -1.47884700 | -2.09216300 | 2.09444000  |
| Sc | 0.31070900  | -0.00000500 | -0.00010100 |
| Sc | -2.89253200 | -0.00001600 | 0.00025500  |
| Br | 1.93376900  | 1.95012200  | -0.00013700 |
| Br | 1.93380600  | -1.95009800 | -0.00010900 |

State=1-A\HF=-6978.0224519\RMSD=2.484e-09\RMSF=1.037e-04\ZeroPoint=0.134013\  
Thermal=0.1470539\

### triplet Isomer 2 of X = Br

Charge = 0 Multiplicity = 3

|   |             |             |             |
|---|-------------|-------------|-------------|
| C | -1.37474400 | -0.00030300 | -1.84400800 |
| C | -1.45818100 | 1.31611700  | -1.30787300 |
| C | -1.52232100 | 1.86389600  | -0.00017000 |
| C | -1.45820200 | -1.31655100 | -1.30745300 |
| C | -1.45793400 | 1.31654400  | 1.30769700  |
| C | -1.52230300 | -1.86390400 | 0.00042800  |

|    |             |             |             |
|----|-------------|-------------|-------------|
| C  | -1.45788800 | -1.31612500 | 1.30811800  |
| H  | -1.35089300 | -0.00047700 | -2.93638900 |
| H  | -1.47608000 | 2.08160800  | -2.08674700 |
| H  | -1.58557900 | 2.95414600  | -0.00034300 |
| H  | -1.47610900 | -2.08229200 | -2.08608000 |
| H  | -1.58555000 | -2.95415600 | 0.00061300  |
| C  | -1.37434700 | 0.00029700  | 1.84423300  |
| H  | -1.47567300 | 2.08228400  | 2.08632800  |
| H  | -1.35027500 | 0.00047000  | 2.93660900  |
| H  | -1.47560400 | -2.08161600 | 2.08699500  |
| Sc | 0.38072800  | -0.00000200 | -0.00006600 |
| Sc | -3.06814200 | -0.00001200 | 0.00029100  |
| Br | 1.97094500  | 1.93548800  | -0.00019000 |
| Br | 1.97096800  | -1.93547300 | -0.00013900 |

State=3-A\HF=-6978.0212783\S2=2.004777\S2-1=0.\S2A=2.000012\RMSD=4.767e-09\  
RMSF=3.573e-05\ZeroPoint=0.1339723\Thermal=0.1470691\

**singlet Isomer 3 of X = F**

Charge = 0 Multiplicity = 1

|    |             |             |             |
|----|-------------|-------------|-------------|
| H  | 0.82213200  | 2.01506200  | -2.12715100 |
| H  | 1.26898600  | 2.98804800  | 0.00367800  |
| H  | 0.81960600  | 2.01079900  | 2.13205000  |
| H  | -0.31657100 | -0.06469400 | -2.50629800 |
| H  | -2.64924200 | 0.38407100  | -2.13647400 |
| H  | -0.31923900 | -0.06995200 | 2.50550800  |
| H  | -2.65158200 | 0.37958600  | 2.13416900  |
| H  | -3.68573000 | 0.61976000  | -0.00149500 |
| C  | -1.99006800 | 0.40024400  | -1.26600500 |
| C  | -2.59310600 | 0.56409400  | -0.00094200 |
| C  | -1.99147400 | 0.39750500  | 1.26444400  |
| C  | -0.50760500 | 0.34121500  | 1.50122300  |
| C  | 0.39405400  | 1.51285300  | 1.25797800  |
| C  | 0.62914500  | 2.10100500  | 0.00241900  |
| C  | 0.39555300  | 1.51534300  | -1.25459000 |
| C  | -0.50596600 | 0.34432800  | -1.50133700 |
| Sc | -1.09884800 | -1.26640700 | -0.00203000 |
| Sc | 1.45320800  | -0.12201300 | 0.00073700  |
| F  | 0.71431200  | -2.15498000 | -0.00185400 |
| F  | 3.31756400  | -0.30784000 | 0.00230000  |

State=1-A\HF=-2030.1090893\RMSD=3.322e-09\RMSF=9.354e-04\ZeroPoint=0.1332764\  
Thermal=0.1455315\

**triplet Isomer 3 of X = F**

Charge = 0 Multiplicity = 3

|   |             |             |             |
|---|-------------|-------------|-------------|
| H | 2.03160400  | -1.30914200 | 2.09367100  |
| H | 2.86874900  | -1.94806600 | 0.00004900  |
| H | 2.03167700  | -1.30912900 | -2.09359500 |
| H | -0.00004700 | -0.43926800 | 2.69018200  |

|    |             |             |             |
|----|-------------|-------------|-------------|
| H  | -2.03167400 | -1.30913300 | 2.09359600  |
| H  | 0.00004900  | -0.43926800 | -2.69018200 |
| H  | -2.03160100 | -1.30914600 | -2.09367200 |
| H  | -2.86874700 | -1.94806900 | -0.00004900 |
| C  | -1.31630400 | -1.25179900 | 1.26783500  |
| C  | -1.83772300 | -1.58685300 | -0.00003200 |
| C  | -1.31626200 | -1.25180400 | -1.26788400 |
| C  | 0.00002900  | -0.80965600 | -1.66026400 |
| C  | 1.31630600  | -1.25179600 | -1.26783500 |
| C  | 1.83772500  | -1.58684900 | 0.00003200  |
| C  | 1.31626400  | -1.25180100 | 1.26788400  |
| C  | -0.00002700 | -0.80965600 | 1.66026400  |
| Sc | -1.46326100 | 0.75243000  | -0.00002500 |
| Sc | 1.46326000  | 0.75243200  | 0.00002500  |
| F  | -2.78443300 | 2.06724500  | 0.00003600  |
| F  | 2.78442800  | 2.06724500  | -0.00003600 |

State=3-A\HF=-2030.0955658\S2=2.004561\S2-1=0.\S2A=2.000011\RMSD=9.553e-09\RMSF=7.617e-04\ZeroPoint=0.1351552\Thermal=0.1480398\

### singlet Isomer 3 of X = Cl

Charge = 0 Multiplicity = 1

|    |             |             |             |
|----|-------------|-------------|-------------|
| H  | -0.37367000 | -2.22364700 | -2.12412700 |
| H  | -0.73612600 | -3.23897100 | 0.00369900  |
| H  | -0.37116500 | -2.21919500 | 2.12899100  |
| H  | 0.63014200  | -0.08167300 | -2.50186500 |
| H  | 2.98313400  | -0.37825600 | -2.13530900 |
| H  | 0.63271500  | -0.07621000 | 2.50090900  |
| H  | 2.98536500  | -0.37357200 | 2.13259800  |
| H  | 4.03841200  | -0.57660600 | -0.00170600 |
| C  | 2.32985200  | -0.44427200 | -1.26284200 |
| C  | 2.94452100  | -0.58281700 | -0.00112100 |
| C  | 2.33118700  | -0.44138900 | 1.26094300  |
| C  | 0.84842600  | -0.47357900 | 1.49766400  |
| C  | 0.03693100  | -1.70654400 | 1.25565100  |
| C  | -0.15230900 | -2.31470700 | 0.00239500  |
| C  | 0.03545700  | -1.70915700 | -1.25234900 |
| C  | 0.84686600  | -0.47686100 | -1.49798400 |
| Sc | 1.38953700  | 1.18544600  | -0.00224600 |
| Sc | -1.12232700 | -0.16385900 | 0.00079600  |
| Cl | -0.69795800 | 2.44877700  | -0.00278600 |
| Cl | -3.46238400 | -0.29520200 | 0.00355900  |

State=1-A\HF=-2750.5703112\RMSD=8.545e-09\RMSF=7.244e-04\ZeroPoint=0.1321815\Thermal=0.1451438\

### triplet Isomer 3 of X = Cl

Charge = 0 Multiplicity = 3

|   |            |             |            |
|---|------------|-------------|------------|
| H | 2.03160500 | -1.55971700 | 2.09367100 |
|---|------------|-------------|------------|

|    |             |             |             |
|----|-------------|-------------|-------------|
| H  | 2.86875000  | -2.19864000 | 0.00004900  |
| H  | 2.03167800  | -1.55970400 | -2.09359500 |
| H  | -0.00004700 | -0.68984300 | 2.69018200  |
| H  | -2.03167300 | -1.55970800 | 2.09359600  |
| H  | 0.00004900  | -0.68984300 | -2.69018200 |
| H  | -2.03160000 | -1.55972100 | -2.09367200 |
| H  | -2.86874600 | -2.19864500 | -0.00004900 |
| C  | -1.31630300 | -1.50237400 | 1.26783500  |
| C  | -1.83772200 | -1.83742800 | -0.00003200 |
| C  | -1.31626100 | -1.50237900 | -1.26788400 |
| C  | 0.00002900  | -1.06023100 | -1.66026400 |
| C  | 1.31630700  | -1.50237100 | -1.26783500 |
| C  | 1.83772600  | -1.83742400 | 0.00003200  |
| C  | 1.31626500  | -1.50237600 | 1.26788400  |
| C  | -0.00002700 | -1.06023100 | 1.66026400  |
| Sc | -1.46326100 | 0.50185500  | -0.00002500 |
| Sc | 1.46326000  | 0.50185700  | 0.00002500  |
| Cl | -2.78443300 | 1.81666900  | 0.00003600  |
| Cl | 2.78442800  | 1.81667000  | -0.00003600 |

State=3-A\HF=-2750.5309774\S2=2.004578\S2-1=0.\S2A=2.000011\RMSD=6.483e-09\  
RMSF=3.229e-05\ZeroPoint=0.134545\Thermal=0.148188\

### singlet Isomer 3 of X = Br

Charge = 0 Multiplicity = 1

|    |             |             |             |
|----|-------------|-------------|-------------|
| H  | -0.03623800 | -2.47287300 | 2.12972400  |
| H  | 0.36144300  | -3.48169900 | 0.00515100  |
| H  | -0.02908500 | -2.47627900 | -2.12189100 |
| H  | -1.11107800 | -0.36631000 | 2.50178700  |
| H  | -3.45080600 | -0.73741500 | 2.12988000  |
| H  | -1.10259500 | -0.37099800 | -2.50160900 |
| H  | -3.44422100 | -0.73835900 | -2.13690300 |
| H  | -4.49556000 | -0.97879500 | -0.00461300 |
| C  | -2.79426300 | -0.78574200 | 1.25870100  |
| C  | -3.40210500 | -0.94858200 | -0.00326800 |
| C  | -2.79054900 | -0.78726500 | -1.26360600 |
| C  | -1.30769700 | -0.77207200 | -1.49793100 |
| C  | -0.46007500 | -1.97862600 | -1.25098400 |
| C  | -0.25429300 | -2.57857300 | 0.00351200  |
| C  | -0.46294600 | -1.97590800 | 1.25633600  |
| C  | -1.31207500 | -0.76926700 | 1.49801300  |
| Sc | -1.91718300 | 0.87612500  | -0.00164900 |
| Sc | 0.64405100  | -0.39955800 | 0.00236600  |
| Br | 0.18938600  | 2.38044500  | 0.00064200  |
| Br | 3.14627000  | -0.51784400 | -0.00124900 |

State=1-A\HF=-6978.0616654\RMSD=8.278e-09\RMSF=6.923e-04\  
ZeroPoint=0.1315884\Thermal=0.1449939\

### triplet Isomer 3 of X = Br



Charge = 0 Multiplicity = 3

|    |             |             |             |
|----|-------------|-------------|-------------|
| H  | 2.02911700  | 2.13823900  | -2.09226900 |
| H  | 2.87035200  | 2.79332500  | 0.00095500  |
| H  | 2.02774900  | 2.13814700  | 2.09360300  |
| H  | 0.00089100  | 1.24050900  | -2.66424200 |
| H  | -2.02775000 | 2.13814900  | -2.09360200 |
| H  | -0.00089200 | 1.24050900  | 2.66424100  |
| H  | -2.02911800 | 2.13824100  | 2.09226900  |
| H  | -2.87035200 | 2.79332800  | -0.00095500 |
| C  | -1.31634000 | 2.08869200  | -1.26421700 |
| C  | -1.84044800 | 2.42992400  | -0.00061200 |
| C  | -1.31716300 | 2.08875200  | 1.26335400  |
| C  | -0.00054800 | 1.63161300  | 1.64143900  |
| C  | 1.31633900  | 2.08869100  | 1.26421700  |
| C  | 1.84044700  | 2.42992200  | 0.00061300  |
| C  | 1.31716200  | 2.08875100  | -1.26335400 |
| C  | 0.00054600  | 1.63161300  | -1.64143900 |
| Sc | -1.45364800 | 0.09740500  | -0.00035400 |
| Sc | 1.45364600  | 0.09740300  | 0.00035500  |
| Br | -3.16288400 | -1.70827500 | 0.00025700  |
| Br | 3.16288700  | -1.70827200 | -0.00025800 |

State=3-A\HF=-6978.0212783\S2=2.004777\S2-1=0.\S2A=2.000012\RMSD=4.767e-09\  
RMSF=3.573e-05\ZeroPoint=0.1339723\Thermal=0.1470691\

### 9. The detailed Cartesian coordinates of X[Sc-C<sub>8</sub>H<sub>8</sub>-Sc]<sub>2</sub>X (X = F, Cl, Br) obtained at PBEPBE/ TZVP level.

#### singlet F[Sc-C<sub>8</sub>H<sub>8</sub>-Sc]<sub>2</sub>F

Charge = 0 Multiplicity = 1

|    |             |             |             |
|----|-------------|-------------|-------------|
| C  | -1.04455900 | 3.27599300  | 1.45566100  |
| C  | -1.70089500 | 3.11251400  | 0.20465700  |
| C  | -1.27525900 | 3.03286600  | -1.14967500 |
| C  | 0.30878800  | 3.41993900  | 1.87005400  |
| C  | -0.01775700 | 3.07099900  | -1.81271000 |
| C  | 1.56701500  | 3.46515500  | 1.20709000  |
| C  | 1.99296800  | 3.39020800  | -0.14883700 |
| H  | -1.74642300 | 3.30630900  | 2.29816300  |
| H  | -2.79152400 | 3.05869500  | 0.30588900  |
| H  | -2.11290000 | 2.90975300  | -1.84650800 |
| H  | 0.40448300  | 3.53369600  | 2.95719200  |
| H  | 2.40299800  | 3.61446500  | 1.90212600  |
| C  | 1.33553800  | 3.22010500  | -1.39963000 |
| H  | -0.11495800 | 2.98209900  | -2.90178400 |
| H  | 2.03509000  | 3.22070100  | -2.24486100 |
| H  | 3.08111100  | 3.48353000  | -0.25436200 |
| Sc | 0.27621100  | 1.62370800  | 0.16534800  |
| Sc | 0.01775700  | 4.82623800  | -0.10975100 |
| F  | -0.16480700 | 6.71312200  | -0.30478400 |
| C  | 1.04455900  | -3.27599300 | 1.45566100  |

|    |             |             |             |
|----|-------------|-------------|-------------|
| C  | 1.70089500  | -3.11251400 | 0.20465700  |
| C  | 1.27525900  | -3.03286600 | -1.14967500 |
| C  | -0.30878800 | -3.41993900 | 1.87005400  |
| C  | 0.01775700  | -3.07099900 | -1.81271000 |
| C  | -1.56701500 | -3.46515500 | 1.20709000  |
| C  | -1.99296800 | -3.39020800 | -0.14883700 |
| H  | 1.74642300  | -3.30630900 | 2.29816300  |
| H  | 2.79152400  | -3.05869500 | 0.30588900  |
| H  | 2.11290000  | -2.90975300 | -1.84650800 |
| H  | -0.40448300 | -3.53369600 | 2.95719200  |
| H  | -2.40299800 | -3.61446500 | 1.90212600  |
| C  | -1.33553800 | -3.22010500 | -1.39963000 |
| H  | 0.11495800  | -2.98209900 | -2.90178400 |
| H  | -2.03509000 | -3.22070100 | -2.24486100 |
| H  | -3.08111100 | -3.48353000 | -0.25436200 |
| Sc | -0.27621100 | -1.62370800 | 0.16534800  |
| Sc | -0.01775700 | -4.82623800 | -0.10975100 |
| F  | 0.16480700  | -6.71312200 | -0.30478400 |

State=1-A\HF=-3860.4101534\

**triplet F[Sc-C<sub>8</sub>H<sub>8</sub>-Sc]<sub>2</sub>F**

Charge = 0 Multiplicity = 3

|    |             |             |             |
|----|-------------|-------------|-------------|
| C  | -1.12925400 | 3.26480400  | 1.45182800  |
| C  | -1.77682100 | 3.10440000  | 0.19418900  |
| C  | -1.34429000 | 2.99534600  | -1.15768000 |
| C  | 0.22249000  | 3.37896000  | 1.88020000  |
| C  | -0.08255900 | 2.99714400  | -1.81439500 |
| C  | 1.48422800  | 3.38178700  | 1.22367300  |
| C  | 1.91660200  | 3.27488900  | -0.12955900 |
| H  | -1.84144700 | 3.34209500  | 2.28050600  |
| H  | -2.86780900 | 3.08247500  | 0.28561100  |
| H  | -2.18184500 | 2.90902900  | -1.85784300 |
| H  | 0.30940600  | 3.53723200  | 2.96117600  |
| H  | 2.31909500  | 3.53796500  | 1.91617400  |
| C  | 1.26921300  | 3.11364000  | -1.38769600 |
| H  | -0.17567400 | 2.92531500  | -2.90360500 |
| H  | 1.97652500  | 3.11176100  | -2.22467500 |
| H  | 3.00485700  | 3.35452800  | -0.22737100 |
| Sc | 0.14874400  | 1.48500700  | 0.18729300  |
| Sc | -0.01566100 | 4.77541800  | -0.12623400 |
| F  | -0.14874400 | 6.65390100  | -0.34172900 |
| C  | 1.12925400  | -3.26480400 | 1.45182800  |
| C  | 1.77682100  | -3.10440000 | 0.19418900  |
| C  | 1.34429000  | -2.99534600 | -1.15768000 |
| C  | -0.22249000 | -3.37896000 | 1.88020000  |
| C  | 0.08255900  | -2.99714400 | -1.81439500 |
| C  | -1.48422800 | -3.38178700 | 1.22367300  |
| C  | -1.91660200 | -3.27488900 | -0.12955900 |

|    |             |             |             |
|----|-------------|-------------|-------------|
| H  | 1.84144700  | -3.34209500 | 2.28050600  |
| H  | 2.86780900  | -3.08247500 | 0.28561100  |
| H  | 2.18184500  | -2.90902900 | -1.85784300 |
| H  | -0.30940600 | -3.53723200 | 2.96117600  |
| H  | -2.31909500 | -3.53796500 | 1.91617400  |
| C  | -1.26921300 | -3.11364000 | -1.38769600 |
| H  | 0.17567400  | -2.92531500 | -2.90360500 |
| H  | -1.97652500 | -3.11176100 | -2.22467500 |
| H  | -3.00485700 | -3.35452800 | -0.22737100 |
| Sc | -0.14874400 | -1.48500700 | 0.18729300  |
| Sc | 0.01566100  | -4.77541800 | -0.12623400 |
| F  | 0.14874400  | -6.65390100 | -0.34172900 |

State=3-B\HF=-3860.3987068\S2=2.022695\S2-1=0.\S2A=2.00011\

**singlet Cl[Sc-C<sub>8</sub>H<sub>8</sub>-Sc]<sub>2</sub>Cl**

Charge = 0 Multiplicity = 1

|    |             |             |             |
|----|-------------|-------------|-------------|
| C  | -1.08381700 | 3.27074700  | 1.46996200  |
| C  | -1.73675800 | 3.11935500  | 0.21456700  |
| C  | -1.30664100 | 3.04770100  | -1.13979800 |
| C  | 0.26909100  | 3.40844800  | 1.89032300  |
| C  | -0.04622500 | 3.09005500  | -1.79887600 |
| C  | 1.53027400  | 3.45508900  | 1.23156600  |
| C  | 1.96072300  | 3.38671100  | -0.12405700 |
| H  | -1.78807400 | 3.29401000  | 2.30991600  |
| H  | -2.82685600 | 3.06018600  | 0.31235300  |
| H  | -2.14177500 | 2.92998600  | -1.83972700 |
| H  | 0.36149200  | 3.51016200  | 2.97825600  |
| H  | 2.36436600  | 3.59186300  | 1.93040900  |
| C  | 1.30664100  | 3.23210600  | -1.37944100 |
| H  | -0.13959100 | 3.00733400  | -2.88818000 |
| H  | 2.00920200  | 3.23402700  | -2.22131800 |
| H  | 3.04915000  | 3.47401200  | -0.22489800 |
| Sc | 0.23447700  | 1.64703200  | 0.16924900  |
| Sc | -0.00927400 | 4.82039700  | -0.07796500 |
| C  | 1.08381700  | -3.27074700 | 1.46996200  |
| C  | 1.73675800  | -3.11935500 | 0.21456700  |
| C  | 1.30664100  | -3.04770100 | -1.13979800 |
| C  | -0.26909100 | -3.40844800 | 1.89032300  |
| C  | 0.04622500  | -3.09005500 | -1.79887600 |
| C  | -1.53027400 | -3.45508900 | 1.23156600  |
| C  | -1.96072300 | -3.38671100 | -0.12405700 |
| H  | 1.78807400  | -3.29401000 | 2.30991600  |
| H  | 2.82685600  | -3.06018600 | 0.31235300  |
| H  | 2.14177500  | -2.92998600 | -1.83972700 |
| H  | -0.36149200 | -3.51016200 | 2.97825600  |
| H  | -2.36436600 | -3.59186300 | 1.93040900  |
| C  | -1.30664100 | -3.23210600 | -1.37944100 |
| H  | 0.13959100  | -3.00733400 | -2.88818000 |

|    |             |             |             |
|----|-------------|-------------|-------------|
| H  | -2.00920200 | -3.23402700 | -2.22131800 |
| H  | -3.04915000 | -3.47401200 | -0.22489800 |
| Sc | -0.23447700 | -1.64703200 | 0.16924900  |
| Sc | 0.00927400  | -4.82039700 | -0.07796500 |
| Cl | -0.18781400 | 7.15015500  | -0.26230800 |
| Cl | 0.18781400  | -7.15015500 | -0.26230800 |

State=1-A\HF=-4580.8866947\

**triplet Cl[Sc-C<sub>8</sub>H<sub>8</sub>-Sc]<sub>2</sub>Cl**

Charge = 0 Multiplicity = 3

|    |             |             |             |
|----|-------------|-------------|-------------|
| C  | -1.03850000 | 3.19108600  | 1.54076300  |
| C  | -1.83063000 | 3.19218900  | 0.35840300  |
| C  | -1.54754300 | 3.19166200  | -1.03561300 |
| C  | 0.35869000  | 3.19217300  | 1.82029900  |
| C  | -0.35900200 | 3.19268700  | -1.82024800 |
| C  | 1.54722800  | 3.19148800  | 1.03567100  |
| C  | 1.83030500  | 3.19237300  | -0.35834000 |
| H  | -1.64523500 | 3.21893100  | 2.45179400  |
| H  | -2.90439900 | 3.22314800  | 0.57142800  |
| H  | -2.45347200 | 3.22507300  | -1.64988100 |
| H  | 0.56805100  | 3.21182900  | 2.89473700  |
| H  | 2.45315300  | 3.22486900  | 1.64994100  |
| C  | 1.03818200  | 3.19158400  | -1.54070200 |
| H  | -0.56836800 | 3.21257900  | -2.89468100 |
| H  | 1.64491900  | 3.21968400  | -2.45172400 |
| H  | 2.90406700  | 3.22347400  | -0.57136600 |
| Sc | -0.00010400 | 1.50985700  | -0.00024600 |
| Sc | -0.00010400 | 4.79097000  | 0.00019800  |
| C  | 1.03850000  | -3.19108600 | 1.54076300  |
| C  | 1.83063000  | -3.19218900 | 0.35840300  |
| C  | 1.54754300  | -3.19166200 | -1.03561300 |
| C  | -0.35869000 | -3.19217300 | 1.82029900  |
| C  | 0.35900200  | -3.19268700 | -1.82024800 |
| C  | -1.54722800 | -3.19148800 | 1.03567100  |
| C  | -1.83030500 | -3.19237300 | -0.35834000 |
| H  | 1.64523500  | -3.21893100 | 2.45179400  |
| H  | 2.90439900  | -3.22314800 | 0.57142800  |
| H  | 2.45347200  | -3.22507300 | -1.64988100 |
| H  | -0.56805100 | -3.21182900 | 2.89473700  |
| H  | -2.45315300 | -3.22486900 | 1.64994100  |
| C  | -1.03818200 | -3.19158400 | -1.54070200 |
| H  | 0.56836800  | -3.21257900 | -2.89468100 |
| H  | -1.64491900 | -3.21968400 | -2.45172400 |
| H  | -2.90406700 | -3.22347400 | -0.57136600 |
| Sc | 0.00010400  | -1.50985700 | -0.00024600 |
| Sc | 0.00010400  | -4.79097000 | 0.00019800  |
| Cl | 0.00322800  | 7.12777600  | -0.00003800 |
| Cl | -0.00322800 | -7.12777600 | -0.00003800 |

State=3-A\HF=-4580.8722148\S2=2.024765\S2-1=0.\S2A=2.000107\

**singlet Br[Sc-C<sub>8</sub>H<sub>8</sub>-Sc]<sub>2</sub>Br**

Charge = 0 Multiplicity = 1

|    |             |             |             |
|----|-------------|-------------|-------------|
| C  | -1.02562500 | 3.28502800  | 1.50789500  |
| C  | -1.67562800 | 3.14334500  | 0.24963900  |
| C  | -1.24069100 | 3.06192100  | -1.10277900 |
| C  | 0.32782400  | 3.40052900  | 1.93414900  |
| C  | 0.02323800  | 3.08313500  | -1.75677100 |
| C  | 1.59262600  | 3.42667200  | 1.28057400  |
| C  | 2.02781100  | 3.34917000  | -0.07327400 |
| H  | -1.73300100 | 3.31996700  | 2.34470800  |
| H  | -2.76685000 | 3.10074400  | 0.34280200  |
| H  | -2.07459500 | 2.95771400  | -1.80620000 |
| H  | 0.41721700  | 3.50128600  | 3.02236900  |
| H  | 2.42584500  | 3.55010300  | 1.98285000  |
| C  | 1.37667000  | 3.20360500  | -1.33156200 |
| H  | -0.06689000 | 3.00036100  | -2.84626800 |
| H  | 2.08283000  | 3.19334700  | -2.17033200 |
| H  | 3.11796500  | 3.41794200  | -0.16938900 |
| Sc | 0.27129800  | 1.64061800  | 0.21409400  |
| Sc | 0.08105100  | 4.80992100  | -0.03730900 |
| C  | 1.02562500  | -3.28502800 | 1.50789500  |
| C  | 1.67562800  | -3.14334500 | 0.24963900  |
| C  | 1.24069100  | -3.06192100 | -1.10277900 |
| C  | -0.32782400 | -3.40052900 | 1.93414900  |
| C  | -0.02323800 | -3.08313500 | -1.75677100 |
| C  | -1.59262600 | -3.42667200 | 1.28057400  |
| C  | -2.02781100 | -3.34917000 | -0.07327400 |
| H  | 1.73300100  | -3.31996700 | 2.34470800  |
| H  | 2.76685000  | -3.10074400 | 0.34280200  |
| H  | 2.07459500  | -2.95771400 | -1.80620000 |
| H  | -0.41721700 | -3.50128600 | 3.02236900  |
| H  | -2.42584500 | -3.55010300 | 1.98285000  |
| C  | -1.37667000 | -3.20360500 | -1.33156200 |
| H  | 0.06689000  | -3.00036100 | -2.84626800 |
| H  | -2.08283000 | -3.19334700 | -2.17033200 |
| H  | -3.11796500 | -3.41794200 | -0.16938900 |
| Sc | -0.27129800 | -1.64061800 | 0.21409400  |
| Sc | -0.08105100 | -4.80992100 | -0.03730900 |
| Br | 0.08105100  | -7.29355500 | -0.24743600 |
| Br | -0.08105100 | 7.29355500  | -0.24743600 |

State=1-A\HF=-8808.3808757\

**triplet Br[Sc-C<sub>8</sub>H<sub>8</sub>-Sc]<sub>2</sub>Br**

Charge = 0 Multiplicity = 3

|   |             |            |            |
|---|-------------|------------|------------|
| C | -1.12925400 | 3.26480400 | 1.45182800 |
|---|-------------|------------|------------|

|    |             |             |             |
|----|-------------|-------------|-------------|
| C  | -1.77682100 | 3.10440000  | 0.19418900  |
| C  | -1.34429000 | 2.99534600  | -1.15768000 |
| C  | 0.22249000  | 3.37896000  | 1.88020000  |
| C  | -0.08255900 | 2.99714400  | -1.81439500 |
| C  | 1.48422800  | 3.38178700  | 1.22367300  |
| C  | 1.91660200  | 3.27488900  | -0.12955900 |
| H  | -1.84144700 | 3.34209500  | 2.28050600  |
| H  | -2.86780900 | 3.08247500  | 0.28561100  |
| H  | -2.18184500 | 2.90902900  | -1.85784300 |
| H  | 0.30940600  | 3.53723200  | 2.96117600  |
| H  | 2.31909500  | 3.53796500  | 1.91617400  |
| C  | 1.26921300  | 3.11364000  | -1.38769600 |
| H  | -0.17567400 | 2.92531500  | -2.90360500 |
| H  | 1.97652500  | 3.11176100  | -2.22467500 |
| H  | 3.00485700  | 3.35452800  | -0.22737100 |
| Sc | 0.14874400  | 1.48500700  | 0.18729300  |
| Sc | -0.01566100 | 4.77541800  | -0.12623400 |
| F  | -0.14874400 | 6.65390100  | -0.34172900 |
| C  | 1.12925400  | -3.26480400 | 1.45182800  |
| C  | 1.77682100  | -3.10440000 | 0.19418900  |
| C  | 1.34429000  | -2.99534600 | -1.15768000 |
| C  | -0.22249000 | -3.37896000 | 1.88020000  |
| C  | 0.08255900  | -2.99714400 | -1.81439500 |
| C  | -1.48422800 | -3.38178700 | 1.22367300  |
| C  | -1.91660200 | -3.27488900 | -0.12955900 |
| H  | 1.84144700  | -3.34209500 | 2.28050600  |
| H  | 2.86780900  | -3.08247500 | 0.28561100  |
| H  | 2.18184500  | -2.90902900 | -1.85784300 |
| H  | -0.30940600 | -3.53723200 | 2.96117600  |
| H  | -2.31909500 | -3.53796500 | 1.91617400  |
| C  | -1.26921300 | -3.11364000 | -1.38769600 |
| H  | 0.17567400  | -2.92531500 | -2.90360500 |
| H  | -1.97652500 | -3.11176100 | -2.22467500 |
| H  | -3.00485700 | -3.35452800 | -0.22737100 |
| Sc | -0.14874400 | -1.48500700 | 0.18729300  |
| Sc | 0.01566100  | -4.77541800 | -0.12623400 |
| F  | 0.14874400  | -6.65390100 | -0.34172900 |

State=3-A\HF=-8808.3657719\S2=2.025337\S2-1=0.\S2A=2.000123\

**10. The detailed Cartesian coordinates of XSc-C<sub>8</sub>H<sub>8</sub>-ScX (X = F, Cl, Br) obtained at CAM-B3LYP/ TZVP level.**

**singlet FSc-C<sub>8</sub>H<sub>8</sub>-ScF**

Title Card Required\0,1\C,3.4317404484,1

.5125658341,-1.304151713\C,3.4272434472,0.2166522968,-1.8624573989\C,3

. 4207880093, -1. 0945506615, -1. 3413140217\C, 3. 4285998056, 2. 0339732159, 0. 0069176032\C, 3. 4136678652, -1. 652987858, -0. 0455226224\C, 3. 4219139425, 1. 4755014765, 1. 3027022278\C, 3. 4152733155, 0. 1643139074, 1. 8237778849\H, 3. 4 38637307, 2. 2893628731, -2. 0595097836\H, 3. 4339707112, 0. 2320235664, -2. 945 8495242\H, 3. 4211917493, -1. 849704543, -2. 1183364134\H, 3. 4319596388, 3. 117 3623546, 0. 0222761012\H, 3. 4219722606, 2. 2306400887, 2. 0797277415\C, 3. 4111 379297, -1. 131588506, 1. 2655535441\H, 3. 4081608597, -2. 7363686306, -0. 06087 0741\H, 3. 4050018529, -1. 9083838101, 2. 0209027709\H, 3. 4110887729, 0. 148945 0875, 2. 9071795705\Sc, 5. 0308158556, 0. 1839637996, -0. 0145503876\Sc, 1. 8126 612546, 0. 1968719686, -0. 0245557031\F, -0. 08629348, 0. 200524333, -0. 0267647 57\F, 6. 929764234, 0. 1777443268, -0. 0050200082\\Version=EM64L-G09RevA. 01\ HF=-2030. 9181294\

### triplet FSc-C<sub>8</sub>H<sub>8</sub>-ScF

Title Card Required\\0, 3\C, -1. 16778403

31, 0. 3122447505, -1. 4052713195\C, -0. 8966957137, 1. 475145732, -0. 660925087 7\C, -0. 0259518174, 1. 7965402918, 0. 4135414029\C, -0. 6725647869, -1. 0190527 721, -1. 385800173\C, 0. 672565059, 1. 0201018622, 1. 3862162932\C, 0. 025950674 2, -1. 7954913278, -0. 4131247561\C, 0. 8966963401, -1. 4740964486, 0. 661340584 1\H, -1. 8260409988, 0. 4979662144, -2. 2421019012\H, -1. 3963550591, 2. 3474223 267, -1. 058259077\H, -0. 0693526117, 2. 8457570875, 0. 6700088764\H, -1. 092451 7381, -1. 6231058828, -2. 1777513492\H, 0. 0693513975, -2. 8447082866, -0. 66959 15138\C, 1. 1677848572, -0. 3111953539, 1. 4056863215\H, 1. 0924521659, 1. 62415 54434, 2. 1781669731\H, 1. 8260426266, -0. 496916276, 2. 2425164473\H, 1. 396354 9635, -2. 346373133, 1. 058675155\Sc, 1. 2247368567, 0. 4045461314, -1. 11797257 53\Sc, -1. 2247378215, -0. 40349692, 1. 1183896387\F, -2. 5338564692, -0. 888920 6966, 2. 3770735017\F, 2. 5338561088, 0. 8899712577, -2. 3766544411\\Version=E M64L-G09RevA. 01\HF=-2030. 9059809\S2=2. 023092\S2-1=0. \S2A=2. 000133

### singlet ClSc-C<sub>8</sub>H<sub>8</sub>-ScCl

Title Card Required\\0, 1\C, -0. 0001420501

, 1. 254113984, -1. 3569544989\C, -0. 0000560701, 1. 8462528762, -0. 0726623899\ C, 0. 0000783219, 1. 3570527492, 1. 2540415375\C, -0. 0007784344, -0. 0726002671 , -1. 8461397394\C, 0. 0007785582, 0. 0727487482, 1. 8461631862\C, -0. 000082559 4, -1. 3569041819, -1. 254018067\C, 0. 0000561808, -1. 8461042868, 0. 072685845\ H, -0. 000712376, 1. 9894568796, -2. 15219739\H, -0. 0000778192, 2. 928550363, -0 . 1151726629\H, 0. 000589701, 2. 1522713833, 1. 9894107494\H, -0. 0007106017, -0 . 1151075556, -2. 9284378255\H, -0. 0005969223, -2. 1521231595, -1. 9893864577\ C, 0. 0001456513, -1. 2539654384, 1. 3569779041\H, 0. 0007107858, 0. 1152547855, 2. 9284613952\H, 0. 0007211979, -1. 9893091166, 2. 1522197918\H, 0. 0000779919, -2. 9284014269, 0. 1151956252\C1, -3. 9198035148, -0. 0001966107, 0. 0000520062 \C1, 3. 9198027237, -0. 0001865253, -0. 0001122824\Sc, 1. 5849592592, 0. 0000891 041, -0. 0003567169\Sc, -1. 5849600238, 0. 0000396956, 0. 00037699\\Version=EM 64L-G09RevA. 01\HF=-2751. 65852\

### triplet ClSc-C<sub>8</sub>H<sub>8</sub>-ScCl

Title Card Required\\0,3\C,-1.2120994

07, 0.287881931, -1.3626204803\C, -0.9209086783, 1.4541593804, -0.619324450  
2\C, -0.1025994674, 1.7818202892, 0.4842536547\C, -0.6720557288, -1.0256741  
009, -1.4041487753\C, 0.6720731876, 1.0267240406, 1.404552596\C, 0.10260079  
93, -1.7807741084, -0.4838364267\C, 0.9209002623, -1.4531177628, 0.61974646  
59\H, -1.9012940314, 0.4823952965, -2.1725526542\H, -1.4668092723, 2.312983  
482, -0.986264845\H, -0.1966120693, 2.8204428019, 0.7691688159\H, -1.078327  
565, -1.6250854741, -2.2072124106\H, 0.1966102038, -2.8193983598, -0.768747  
3322\C, 1.2120935556, -0.2868402777, 1.3630442897\H, 1.0783479067, 1.626136  
9381, 2.2076134206\H, 1.9012795905, -0.4813542623, 2.1729833343\H, 1.466790  
6822, -2.3119455628, 0.9866935108\Sc, 1.2222771329, 0.2908304277, -1.103211  
1711\Sc, -1.2222666648, -0.2897682062, 1.1036205119\C1, 2.9791730832, 0.757  
7527456, -2.5769786831\C1, -2.9791765198, -0.7566712179, 2.5773806289\\Ver  
sion=EM64L-G09RevA.01\HF=-2751.6361124\S2=2.025478\S2-1=0.\S2A=2.00013  
4

### singlet BrSc-C<sub>8</sub>H<sub>8</sub>-ScBr

Title Card Required\\0,1\C,-0.0011791516

, 1.3503957883, -1.2627564621\C, 0.0000360614, 1.8480374479, 0.0615935547\C  
, 0.000984681, 1.2633301251, 1.3500340454\C, -0.002352554, 0.0619505403, -1.  
8474531596\C, 0.0023494281, -0.0610250367, 1.8476666363\C, -0.0010019672, -  
1.262403073, -1.3498206862\C, -0.0000396827, -1.8471063925, -0.0613808723\  
H, -0.0024285717, 2.1411881163, -2.0029670839\H, -0.0001038971, 2.930617077  
5, 0.0974149245\H, 0.0023180394, 2.003530327, 2.1408362951\H, -0.0029807599  
, 0.0977692944, -2.9300322096\H, -0.0023343834, -2.0026040841, -2.140619988  
2\C, 0.0011879572, -1.3494690371, 1.2629687477\H, 0.00297521, -0.0968443454  
, 2.9302459793\H, 0.002435141, -2.1402632635, 2.0031757488\H, 0.0000985596,  
-2.9296845232, -0.0972026693\Sc, 1.5750860796, 0.0004958461, -0.0014350407  
\Sc, -1.575084646, 0.0003828246, 0.0016372064\Br, 4.0624283402, -0.00054556  
34, -0.0003254914\Br, -4.062426884, -0.0006530686, 0.0000495252\\Version=E  
M64L-G09RevA.01\HF=-6979.773704

### triplet BrSc-C<sub>8</sub>H<sub>8</sub>-ScBr

Title Card Required\\0,3\C,-1.2058111

965, 0.2925386032, -1.3696861667\C, -0.9210277687, 1.4584299265, -0.6245970  
423\C, -0.103464758, 1.7819932242, 0.4810967279\C, -0.6805361034, -1.026093  
5584, -1.3922002212\C, 0.6805282452, 1.0271431427, 1.3926243767\C, 0.103470  
3806, -1.7809405312, -0.4806826037\C, 0.9210292339, -1.4573767636, 0.625015  
8722\H, -1.89018305, 0.4823364626, -2.1851151718\H, -1.4640274501, 2.318765  
688, -0.9934923089\H, -0.1936394815, 2.8202274667, 0.7696061631\H, -1.09296  
99175, -1.6285944514, -2.1904342115\H, 0.1936445959, -2.8191746594, -0.7691  
920306\C, 1.2058175206, -0.2914839536, 1.3700979331\H, 1.0929553365, 1.6296  
420437, 2.1908635531\H, 1.8901914316, -0.4812813742, 2.185525596\H, 1.46403



26704, -2.3177114745, 0.9939081022\Sc, 1.2177709402, 0.3006595255, -1.09373  
97533\Sc, -1.2177775409, -0.2996129249, 1.0941520337\Br, -3.0887925073, -0.  
8152117473, 2.6657759685\Br, 3.088789419, 0.8162453555, -2.6653628165\\Ver  
sion=EM64L-G09RevA.01\HF=-6979.749722\S2=2.027535\S2-1=0.\S2A=2.000155
